# Supplementary material for: Impact of metformin treatment during pregnancy on maternal outcomes: a systematic review/meta-analysis
Source: PubMed Central journal article supplement (PMC8085032; doi:10.1038/s41598-021-88650-5), 2021-04-29
Supplement: 41598_2021_88650_MOESM1_ESM.pdf [file 41598_2021_88650_MOESM1_ESM.pdf]

Supplementary Fig. S1: PRISMA flow diagram

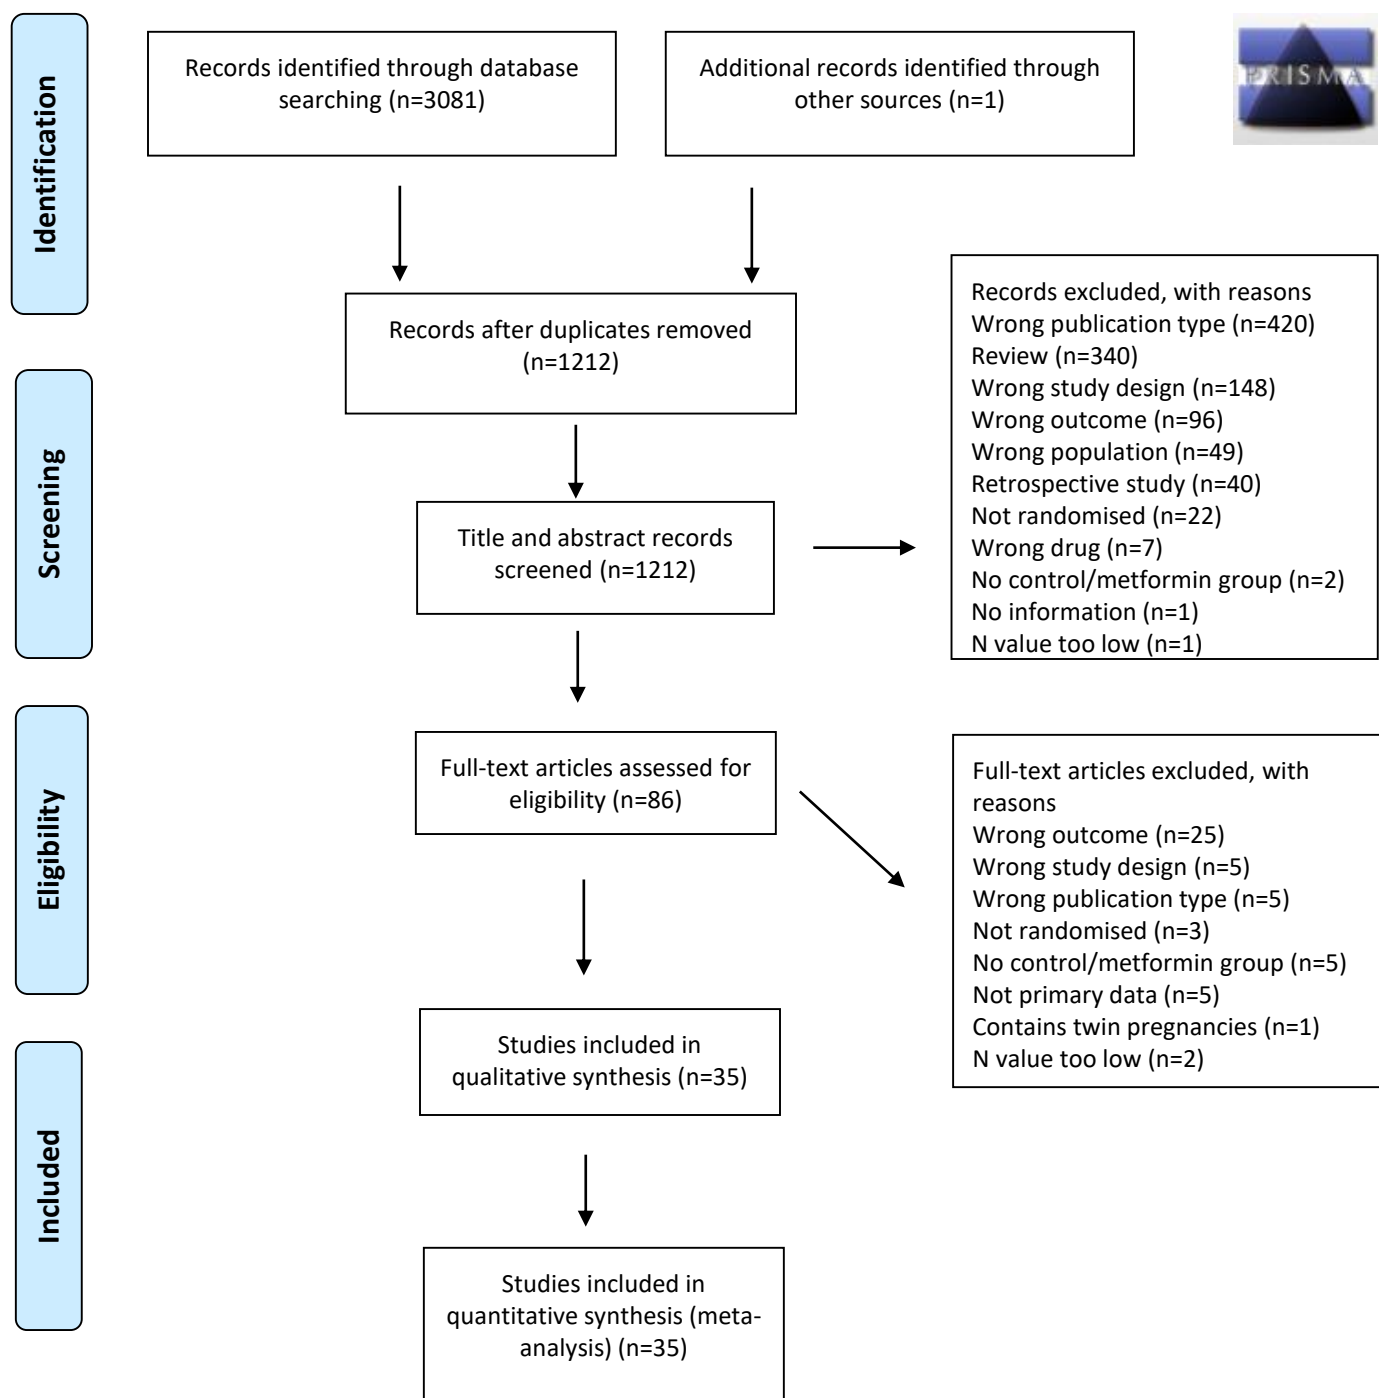

## Supplementary Fig. S2: Sensitivity Analysis: Leave low-quality studies out

### a) Gestational weight gain (throughout pregnancy): Metformin vs. all interventions

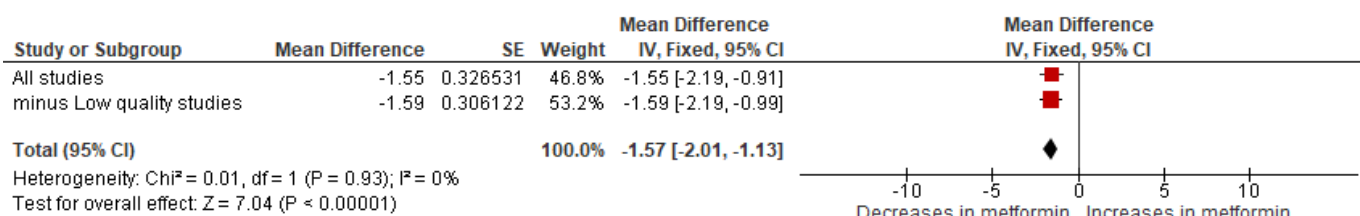

### b) Gestational hypertension: Metformin vs. all interventions

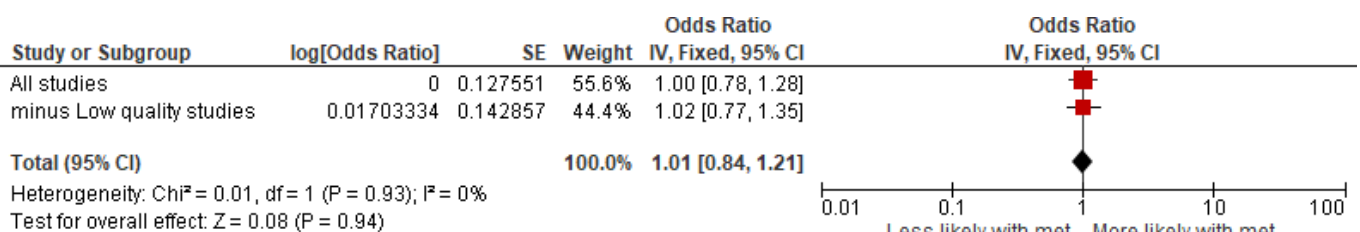

### c) Preeclampsia: Metformin vs. all interventions

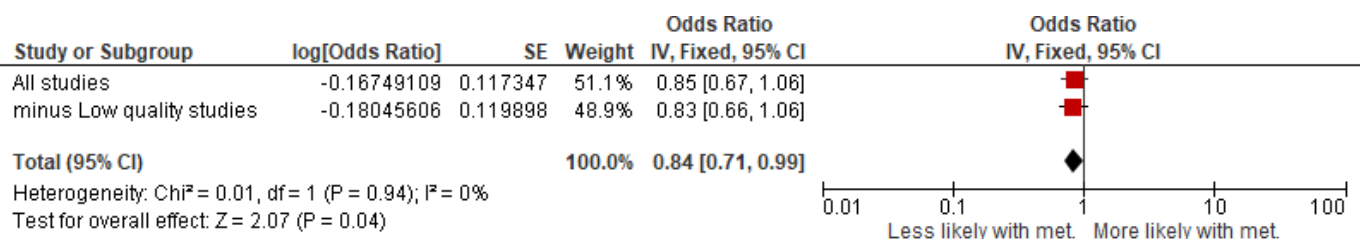

### d) Gestational age at delivery: Metformin vs. all interventions

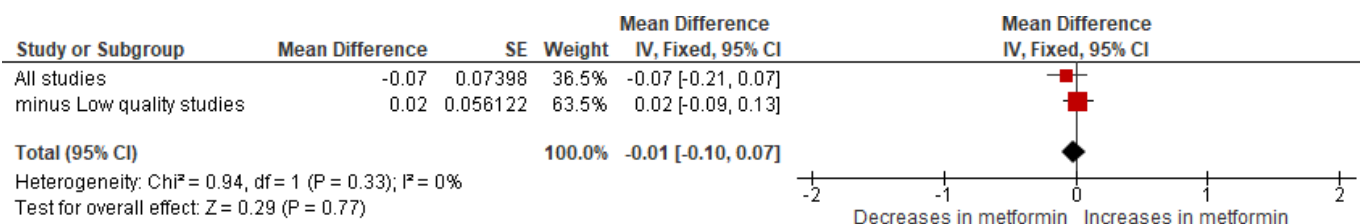

### e) Preterm: Metformin vs. all interventions

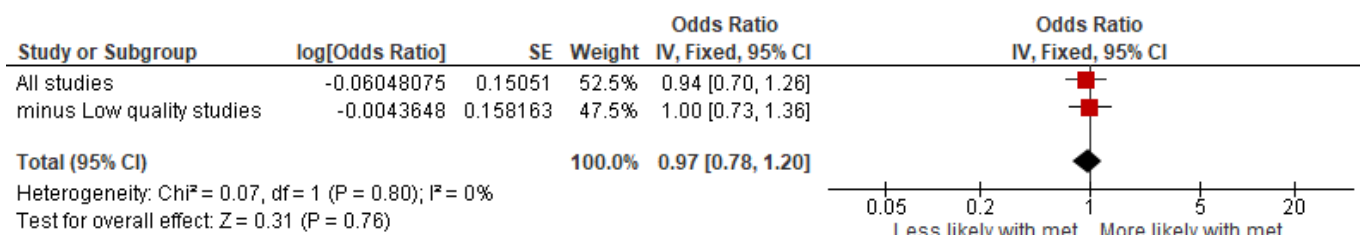

**Supplementary Fig. S2: Sensitivity Analysis: Leave low-quality studies out (continued)**

**f) C-section rates: Metformin vs. all interventions**

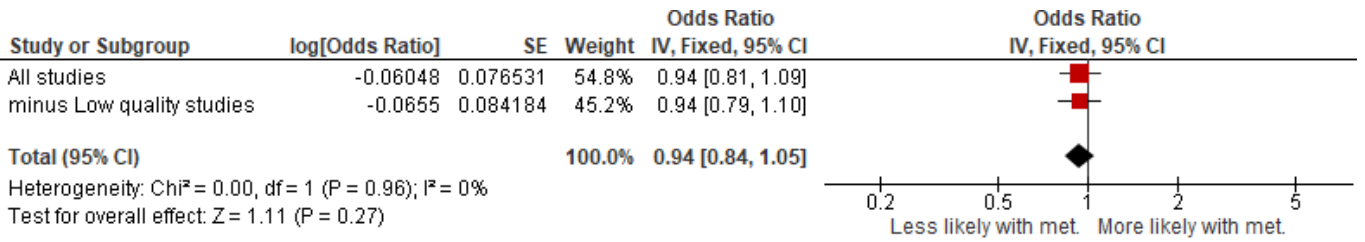

**g) Development of GDM: Metformin vs. all interventions**

No studies reporting this outcome were low quality

Sensitivity analysis of outcome measures when low-quality studies were removed.  
 C-section=cesarean-section; GDM=gestational diabetes mellitus; met=metformin.  
 Odds Ratio or mean difference (where appropriate) ± 95% CI. Fixed or random-effect models where appropriate.

**Supplementary Fig. S3: Sensitivity analysis: Leave-one-out**

**a) Gestational weight gain: Metformin vs. all interventions**

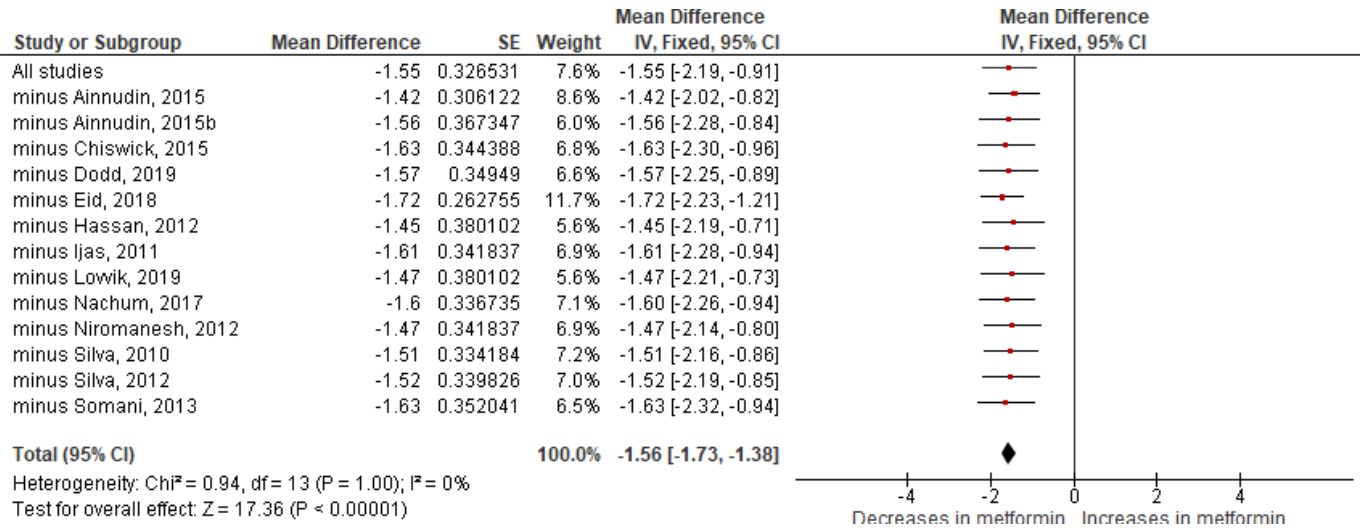

**b) Pre-eclampsia: Metformin vs. all interventions**

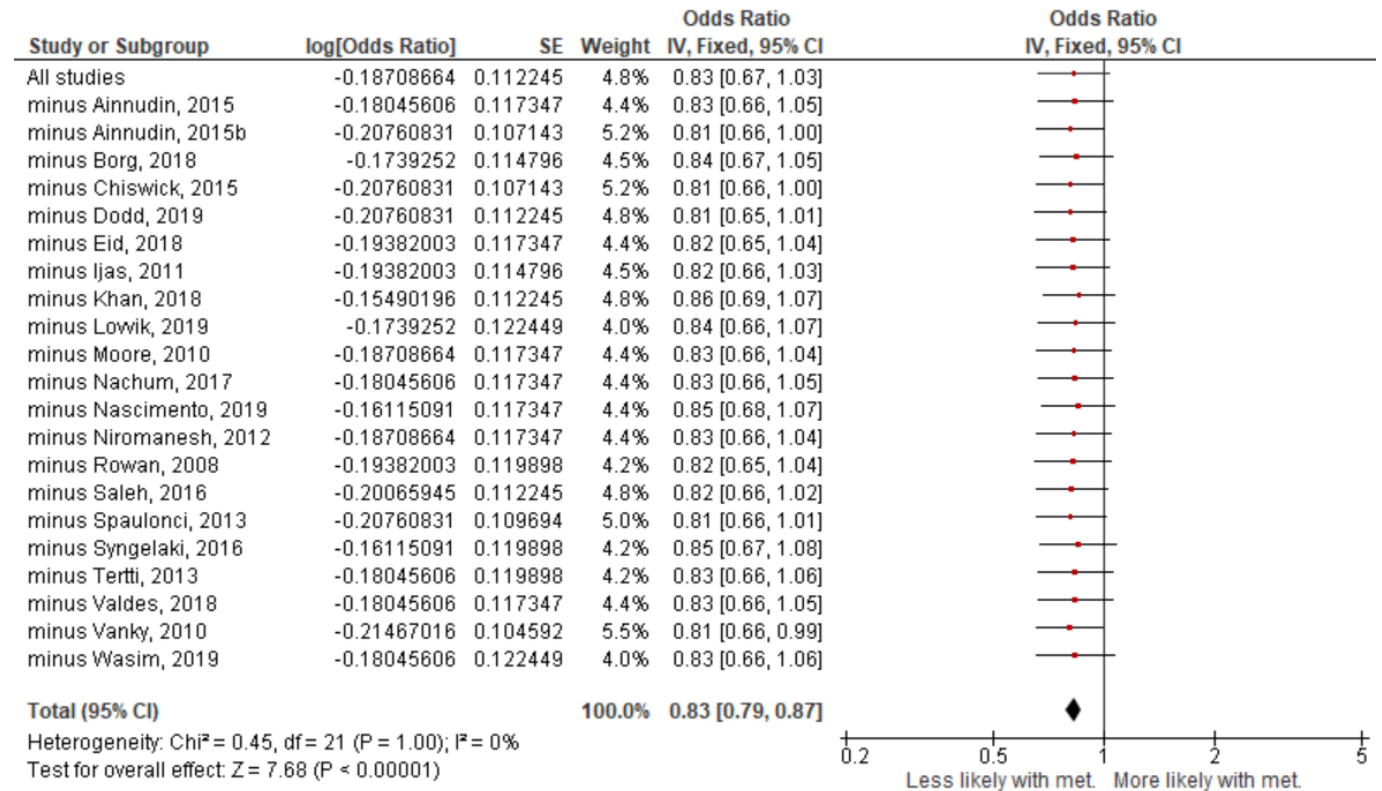

**Supplementary S3 Fig: Sensitivity analysis: Leave-one-out (continued)**

**c) Gestational hypertension: Metformin vs. all interventions**

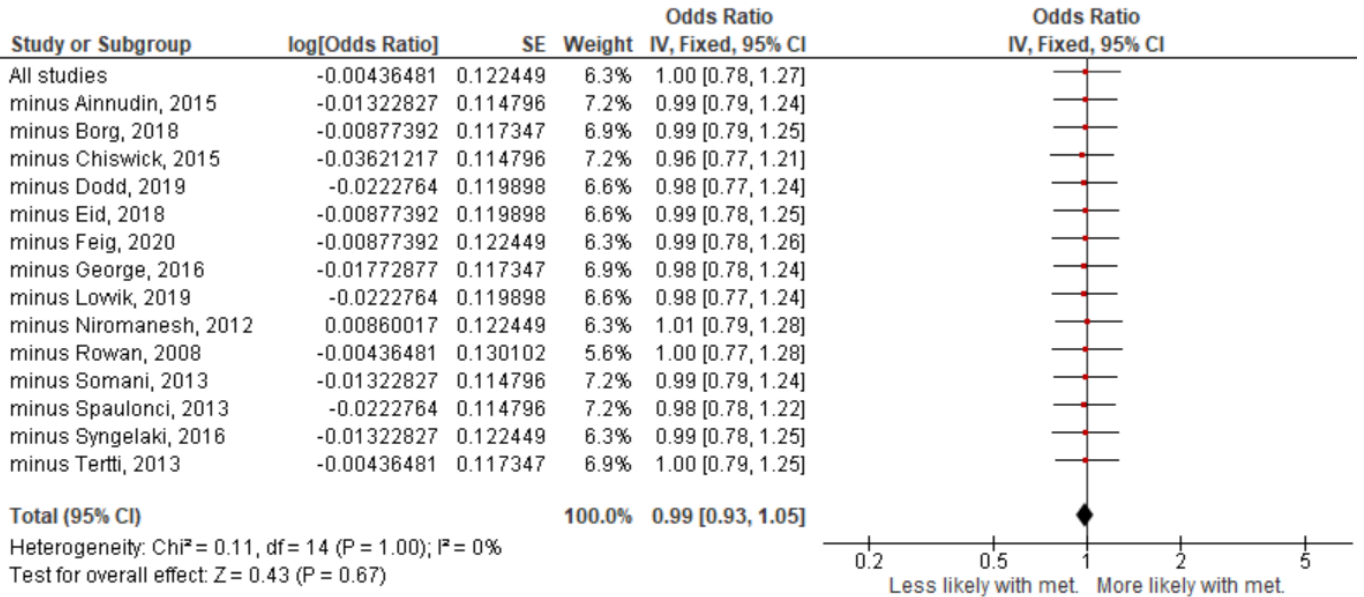

**d) Preterm (all causes): Metformin vs. all interventions**

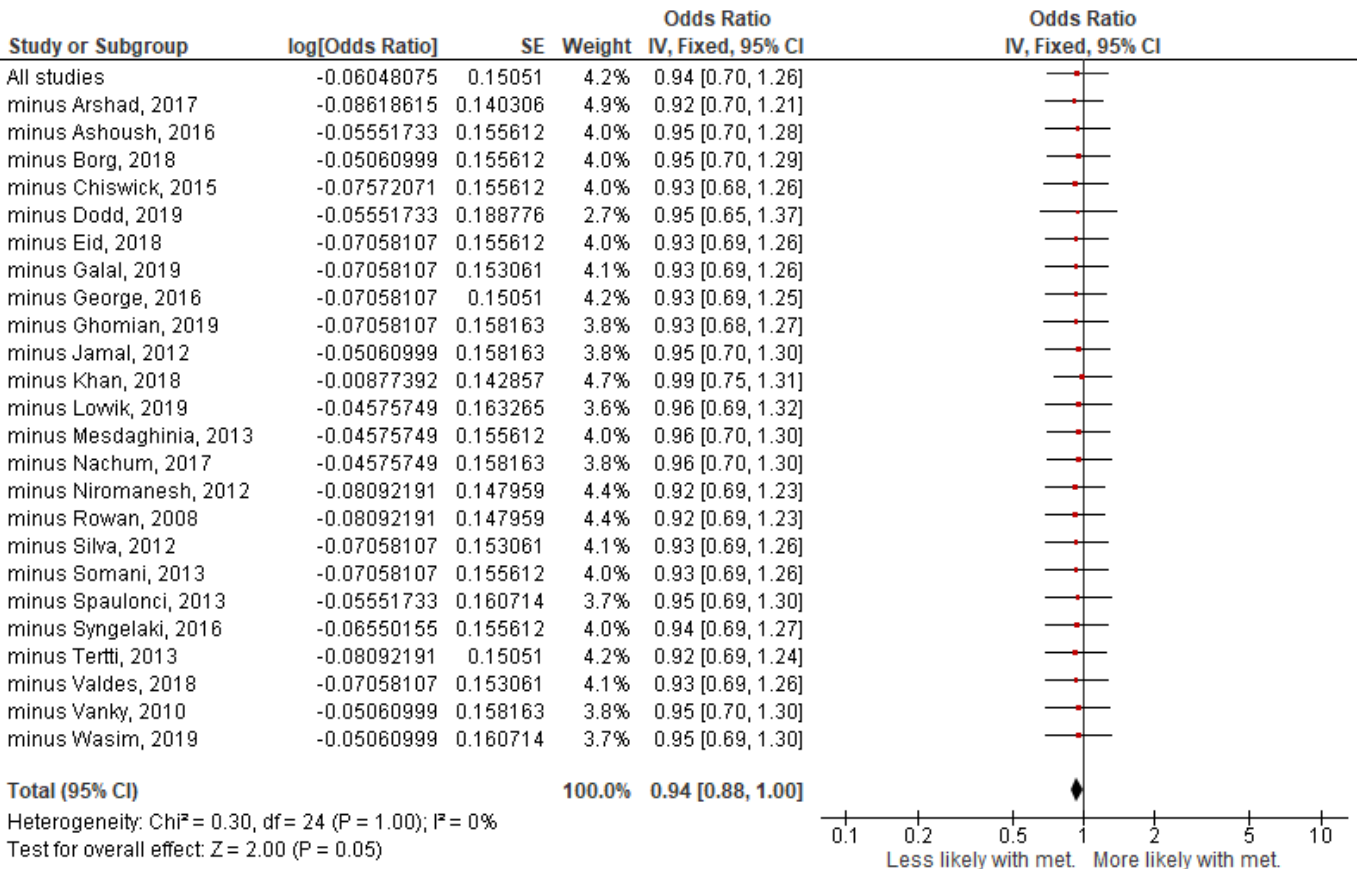

**Supplementary S3 Fig: Sensitivity analysis: Leave-one-out (continued)**

**e) Gestational age at delivery: Metformin vs. all interventions**

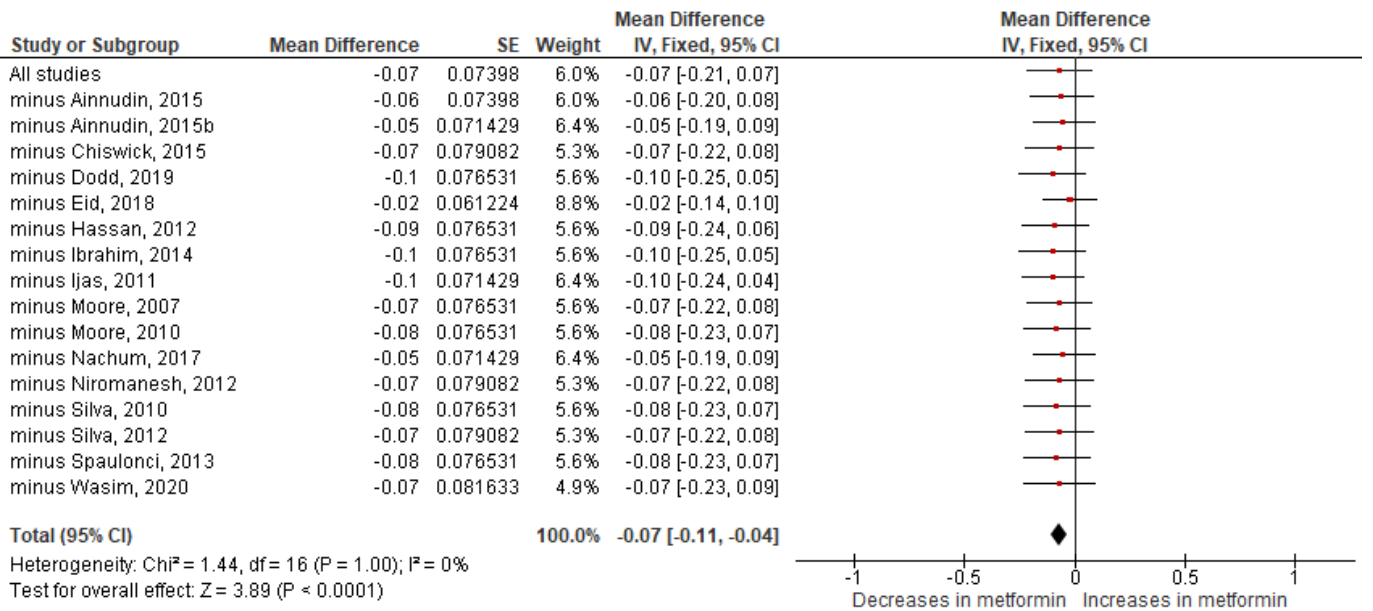

**f) C-section rates: Metformin vs. all interventions**

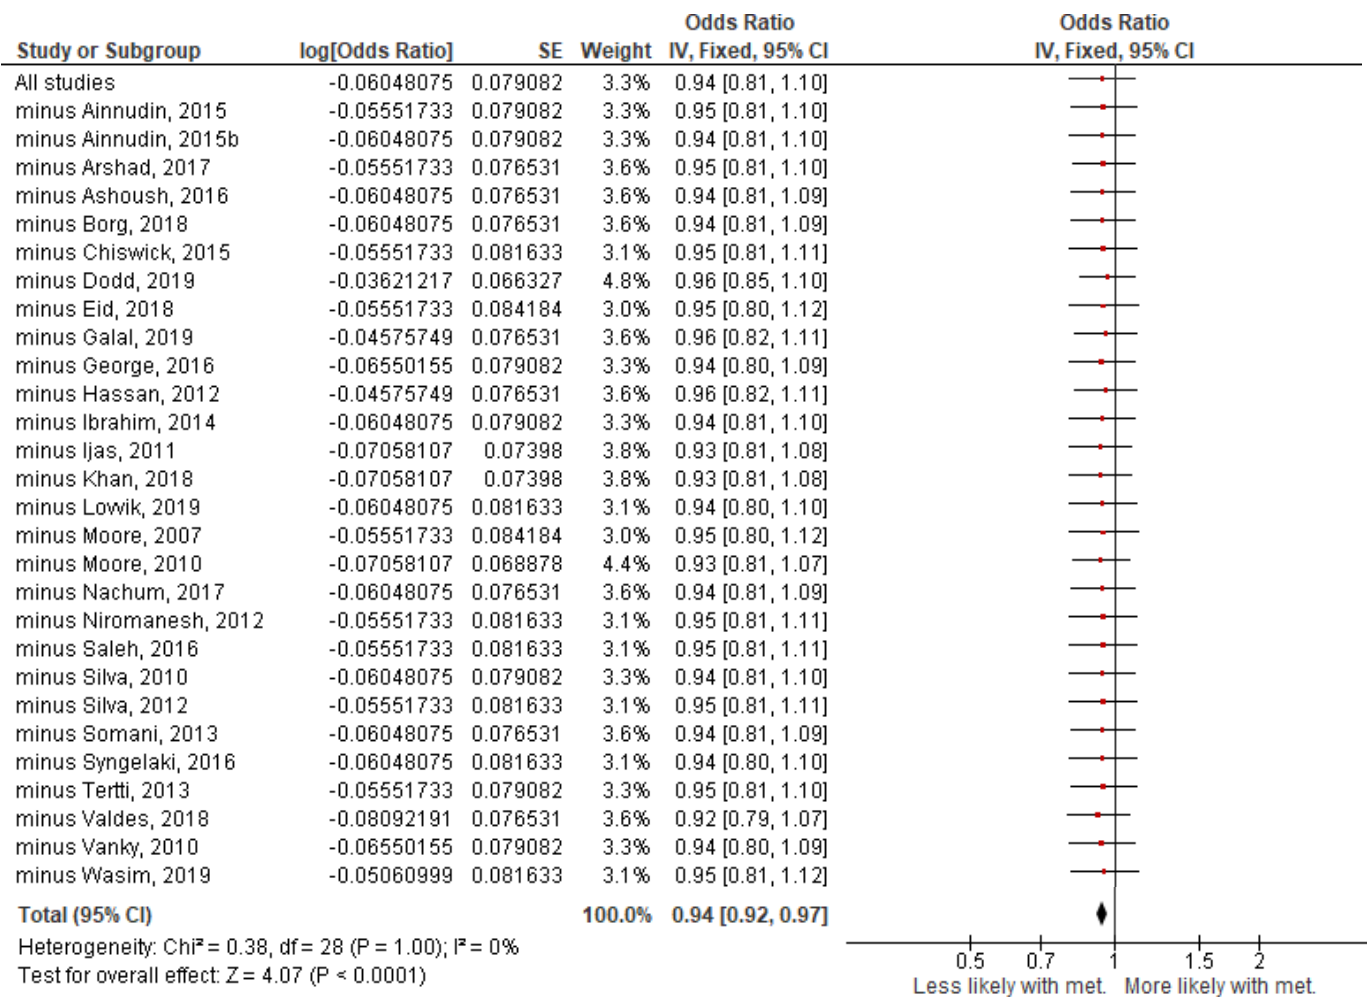

**Supplementary S3 Fig: Sensitivity analysis: Leave-one-out (continued)**

**g) Development of GDM: Metformin vs. all interventions**

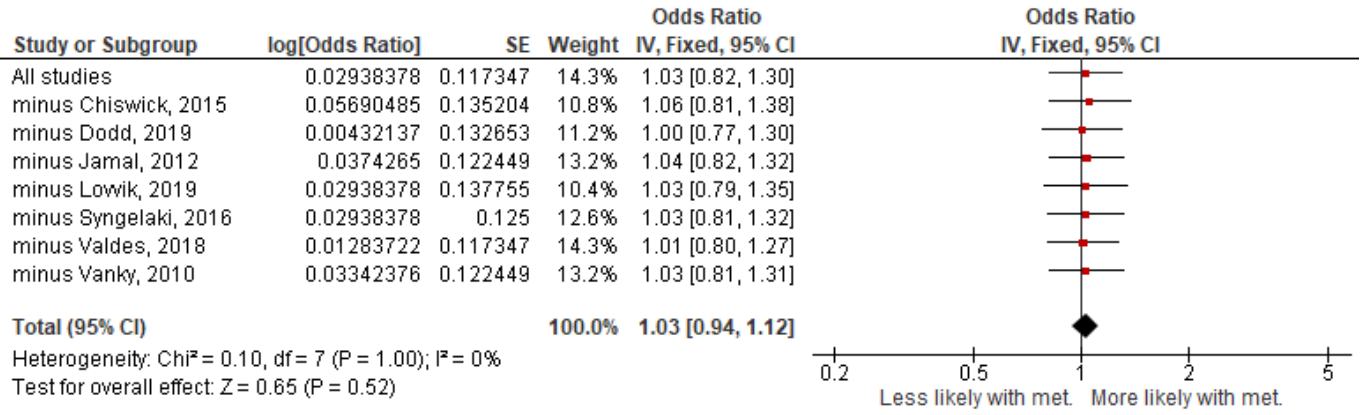

Sensitivity analysis of outcome measures one study was removed.

C-section=ceserean-section; GDM=gestational diabetes mellitus; met=metformin.

Odds Ratio or mean difference (where appropriate) ± 95% CI. Fixed or random-effect models where appropriate.

**Supplementary Fig. S4: Funnel Plots**

**a) Gestational weight gain (throughout pregnancy)**

**b) Gestational hypertension**

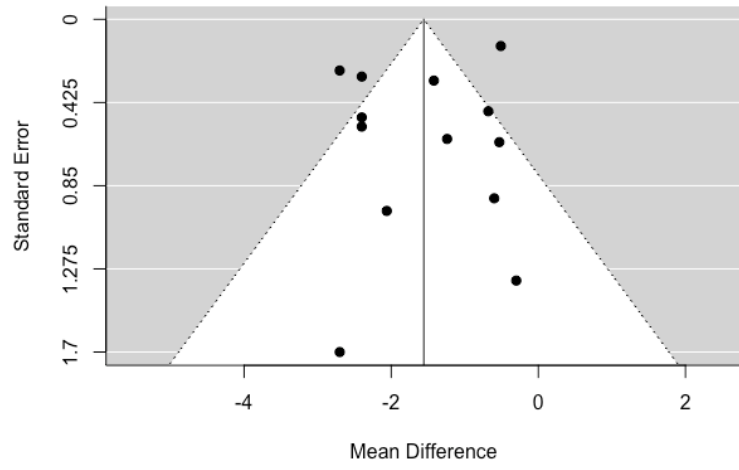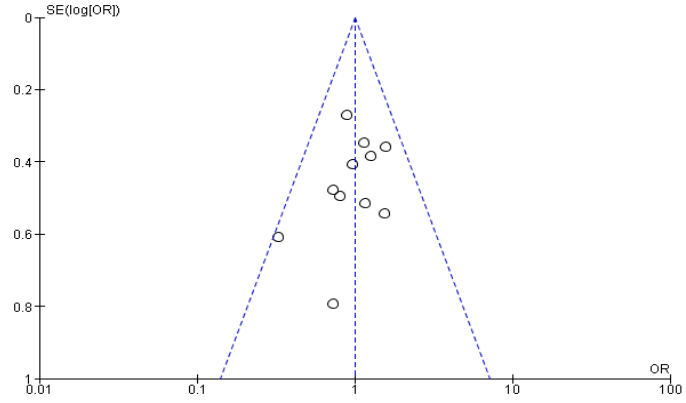

**c) Pre-eclampsia**

**d) Gestational age at delivery**

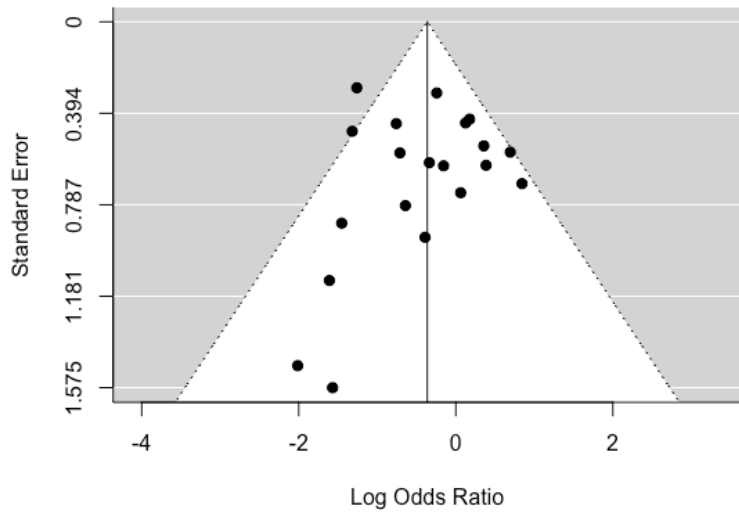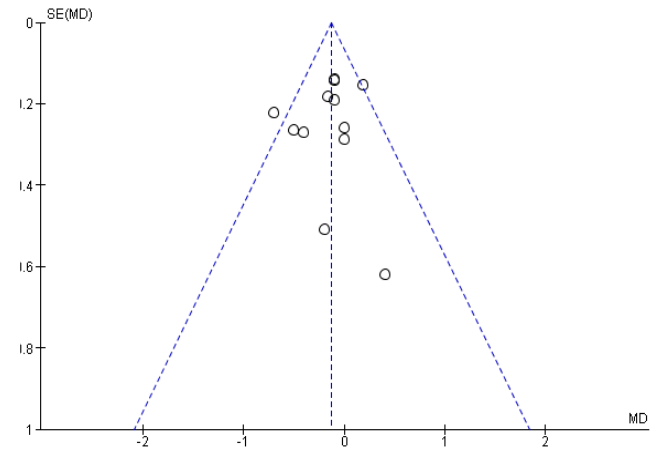

**e) Preterm (all causes)**

**f) Preterm (spontaneous)**

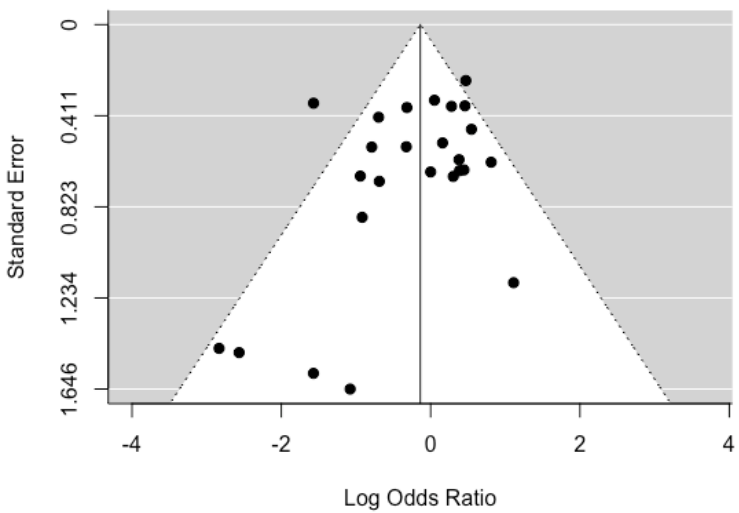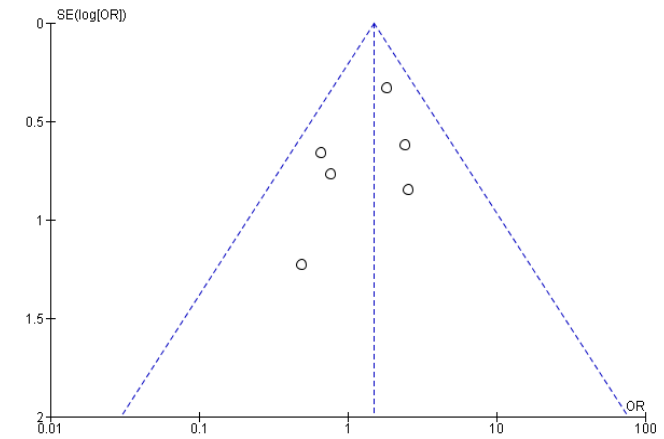



**Supplementary Fig. S4: Funnel Plots (continued)**

**g) Cesarean section rate**

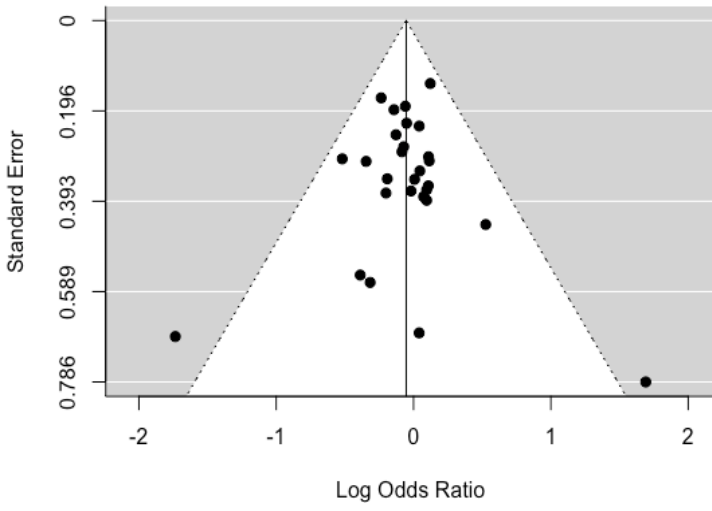

**h) Incidence of GDM**

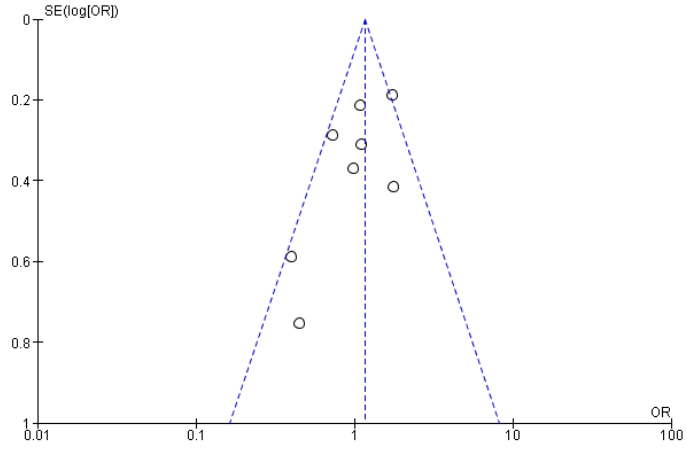

**Funnel Plot analysis**

C-section=ceserean-section; GDM=gestational diabetes mellitus; met=metformin.

Odds Ratio or mean difference (where appropriate)  $\pm$  95% CI. Fixed or random-effect models where appropriate.

# Supplementary Fig S5: GRADE analysis for all primary outcomes

| Outcomes                                                         | Plain language statements                                                                                                                                                                                                                                                                                                                                                                                                                                                                                                                                                                                                                                                                                                                                                                                                                                                                                                                                                                                                                                                                                                                                   | Absolute Effect<br>With any comparator      With Metformin                                                                                                                                                               | Certainty of the evidence<br>GRADE                                                                |
|------------------------------------------------------------------|-------------------------------------------------------------------------------------------------------------------------------------------------------------------------------------------------------------------------------------------------------------------------------------------------------------------------------------------------------------------------------------------------------------------------------------------------------------------------------------------------------------------------------------------------------------------------------------------------------------------------------------------------------------------------------------------------------------------------------------------------------------------------------------------------------------------------------------------------------------------------------------------------------------------------------------------------------------------------------------------------------------------------------------------------------------------------------------------------------------------------------------------------------------|--------------------------------------------------------------------------------------------------------------------------------------------------------------------------------------------------------------------------|---------------------------------------------------------------------------------------------------|
| <b>Gestational hypertension (all studies)</b><br>Follow-up: 0    | <p>(1) Risk of Bias: Studies in this outcome were deemed to have a low risk of bias, with only 1 out of 14 studies not-intention-to-treat. (Removal of this study did not alter this outcome). (2) Imprecision: 4 studies out of 14 in this outcome had large 95% confidence intervals, therefore reducing the precision of this outcome. (3) Inconsistency: Studies in this outcome were deemed to have a very high level of heterogeneity as evidenced by the I<sup>2</sup> value of 87%, with accompanying p value of &lt;0.00001. (4) Indirectness: Participants and interventions in all studies in this outcome did not differ from those of interest. This outcome was also specified in the PROSPERO protocol. (5) Publication bias: All studies for this outcome were judged to have a low publication bias, due to no obvious asymmetries in Funnel plots for any study outcomes and Eggers Testing.</p>                                                                                                                                                                                                                                          | <p>74 per 1000      71 per 1000</p> <p>Difference: 3 fewer per 1000 patients<br/>(95% CI: 16 fewer to 12 more per 1000 patients)<br/>Based on data from 5157 patients in 16 studies</p>                                  | <p>⊕⊕⊕⊕<br/>MODERATE<br/>Due to serious imprecision.</p>                                          |
| <b>Gestational age at delivery (all studies)</b><br>Follow-up: 0 | <p>(1) Risk of Bias: Studies in this outcome were deemed to have a low risk of bias, with 2 out of 17 studies not-intention-to-treat. Removal of these studies did not alter the outcome. (2) Imprecision: This outcome was judged to have a low level of imprecision due to the high number of studies (17) and participants (3081). The majority (2) had modest 95% confidence intervals. (3) Inconsistency: Studies in this outcome were deemed to have a modestly high level of heterogeneity as evidenced by the I<sup>2</sup> value of 47%, with accompanying p value of 0.02. (4) Indirectness: Participants and interventions in all studies in this outcome did not differ from those of interest. This outcome was also specified in the PROSPERO protocol. (5) Publication bias: All studies for this outcome were judged to have a low publication bias, due to no obvious asymmetries in Funnel plots for any study outcomes and Eggers Testing.</p>                                                                                                                                                                                           | <p>38.2 Days      38.13 Days</p> <p>Average difference (MD): 0.07 Days lower<br/>(95% CI: 0.21 Days lower to 0.06 Days higher)<br/>Based on data from 3081 patients in 17 studies</p> <p>0.07 from -0.21 to 0.06</p>     | <p>⊕⊕⊕⊕<br/>MODERATE<br/>Due to serious inconsistency.</p>                                        |
| <b>GWG (through pregnancy) (all studies)</b><br>Follow-up: 0     | <p>(1) Risk of Bias: Studies in this outcome were deemed to have a low risk of bias with 2 studies out of 13 not intention-to-treat. Removal of these studies did not alter the outcome. (2) Imprecision: This outcome was judged to have a low level of imprecision due to the moderately high number of studies (13) and participants (2522). The majority (11) had modest 95% confidence intervals. (3) Inconsistency: Studies in this outcome were deemed to have a very high level of heterogeneity as evidenced by the I<sup>2</sup> value of 87%, with accompanying p value of &lt;0.00001. (4) Indirectness: Participants and interventions in all studies in this outcome did not differ from those of interest. This outcome was also specified in the PROSPERO protocol. (5) Publication bias: All studies for this outcome were judged to have a low publication bias, due to no obvious asymmetries in Funnel plots for any study outcomes and Eggers Testing. • Large magnitude of effect: This outcome considered to have a large magnitude of effect as evidenced by an overall effect of p&lt;0.00001. (-1.55kg 95%CI -2.19 to -0.99).</p> | <p>10.5 kg      8.95 kg</p> <p>Average difference (MD): 1.55 kg lower<br/>(95% CI: 2.19 to 0.91 kg lower)<br/>Based on data from 2522 patients in 13 studies</p> <p>1.55 from -2.19 to -0.91</p>                         | <p>⊕⊕⊕⊕<br/>HIGH<br/>Due to serious inconsistency. Upgraded due to large magnitude of effect.</p> |
| <b>Preterm: All causes (all studies)</b><br>Follow-up: 0         | <p>(1) Risk of Bias: Studies in this outcome were deemed to have a low risk of bias with 2 out of 26 studies not intention-to-treat. Removal of these studies did not alter this outcome. (2) Imprecision: This outcome was judged to have a low level of imprecision due to the high number of studies (26) and participants (6771). The majority (24) had modest 95% confidence intervals. (3) Inconsistency: Studies in this outcome were deemed to have a very high level of heterogeneity as evidenced by the I<sup>2</sup> value of 59%, with accompanying p value of &lt;0.0001. (4) Indirectness: Participants and interventions in all studies in this outcome did not differ from those of interest. This outcome was also specified in the PROSPERO protocol. (5) Publication bias: All studies for this outcome were judged to have a low publication bias, due to no obvious asymmetries in Funnel plots for any study outcomes and Eggers Testing.</p>                                                                                                                                                                                        | <p>96 per 1000      88 per 1000</p> <p>Difference: 8 fewer per 1000 patients<br/>(95% CI: 29 fewer to 19 more per 1000 patients)<br/>Based on data from 6959 patients in 27 studies</p> <p>8 fewer per 1000 patients</p> | <p>⊕⊕⊕⊕<br/>MODERATE<br/>Due to serious inconsistency.</p>                                        |
| <b>Pre-eclampsia (all studies)</b><br>Follow-up: 0               | <p>(1) Risk of Bias: Studies in this outcome were deemed to have a low risk of bias with 3 studies out of 23 not intention-to-treat. Removal of these studies did not alter this outcome. (2) Imprecision: This outcome was judged to have a low level of imprecision due to the high number of studies (23) and participants (6301). The majority (21) had small 95% confidence intervals. (3) Inconsistency: Studies in this outcome were deemed to have a very high level of heterogeneity as evidenced by the I<sup>2</sup> value of 55%, with accompanying p value of 0.0009. (4) Indirectness: Participants and interventions in all studies in this outcome did not differ from those of interest. This outcome was also specified in the PROSPERO protocol. (5) Publication bias: All studies for this outcome were judged to have a low publication bias, due to no obvious asymmetries in Funnel plots for any study outcomes and Eggers Testing.</p>                                                                                                                                                                                             | <p>99 per 1000      70 per 1000</p> <p>Difference: 29 fewer per 1000 patients<br/>(95% CI: 47 to 4 fewer per 1000 patients)<br/>Based on data from 6301 patients in 23 studies</p> <p>29 fewer per 1000 patients</p>     | <p>⊕⊕⊕⊕<br/>MODERATE<br/>Due to serious inconsistency.</p>                                        |

## Supplementary Fig S6: GRADE analysis for secondary outcomes

| Outcomes                                      | Plain language statements                                                                                                                                                                                                                                                                                                                                                                                                                                                                                                                                                                                                                                                                                                                                                                                                                                                                                                                                             | Absolute Effect<br>With any comparator      With Metformin                                                                                                                                    | Relative effect<br>(95% CI)       | Certainty of the evidence<br>GRADE                         |
|-----------------------------------------------|-----------------------------------------------------------------------------------------------------------------------------------------------------------------------------------------------------------------------------------------------------------------------------------------------------------------------------------------------------------------------------------------------------------------------------------------------------------------------------------------------------------------------------------------------------------------------------------------------------------------------------------------------------------------------------------------------------------------------------------------------------------------------------------------------------------------------------------------------------------------------------------------------------------------------------------------------------------------------|-----------------------------------------------------------------------------------------------------------------------------------------------------------------------------------------------|-----------------------------------|------------------------------------------------------------|
| <b>C-section (all reasons)</b>                | <p>(1) Risk of Bias: Studies in this outcome were deemed to have a low risk of bias, with 2 studies out of 51 studies being non intention-to-treat. (Removal of these studies did not alter this outcome). (2) Imprecision: This outcome was judged to have a low level of imprecision due to the high number of studies (51) and participants (7035). The majority (30) had small 95% confidence intervals. (3) Inconsistency: Studies in this outcome were deemed to have a low level of heterogeneity as evidenced by the I2 value of 23%, with accompanying p value of 0.12. (4) Indirectness: Participants and interventions in all studies in this outcome did not differ from those of interest. This outcome was also specified in the PROSPERO protocol. (5) Publication bias: All studies for this outcome were judged to have a low publication bias, due to no obvious asymmetries in Funnel plots for any study outcomes and Eggers Testing.</p>         | <p>406 per 1000      381 per 1000</p> <p>Difference: 25 fewer per 1000 patients<br/>(95% CI: 47 to 0 fewer per 1000 patients)<br/>Based on data from 7053 patients in 51 studies</p>          | <p>OR 0.9<br/>(0.82 to 1)</p>     | <p>⊕⊕⊕⊕<br/>HIGH</p>                                       |
| <b>Development of GDM</b><br>Follow-up: 0     | <p>(1) Risk of Bias: Studies in this outcome were deemed to have a low risk of bias, with no studies out of 7 studies being non intention-to-treat. (2) Imprecision: This outcome was judged to have a high level of imprecision due to the moderately low number of studies (7) and participants (2093), 4 of which had large confidence intervals. (3) Inconsistency: Studies in this outcome were deemed to have a low level of heterogeneity as evidenced by the I2 value of 0%, with accompanying p value of 0.70. (4) Indirectness: Participants and interventions in all studies in this outcome did not differ from those of interest. This outcome was also specified in the PROSPERO protocol. (5) Publication bias: All studies for this outcome were judged to have a low publication bias, due to no obvious asymmetries in Funnel plots for any study outcomes and Eggers Testing.</p>                                                                  | <p>208 per 1000      219 per 1000</p> <p>Difference: 11 more per 1000 patients<br/>(95% CI: 22 fewer to 51 more per 1000 patients)<br/>Based on data from 2065 patients in 7 studies</p>      | <p>OR 1.07<br/>(0.87 to 1.33)</p> | <p>⊕⊕⊕⊕<br/>MODERATE<br/>Due to serious imprecision.</p>   |
| <b>Glycaemic control: FBS</b>                 | <p>(1) Risk of Bias: Studies in this outcome were deemed to have a low risk of bias, with 3 studies out of 18 studies being non intention-to-treat. (Removal of these studies did not alter this outcome). (2) Imprecision: This outcome was judged to have a low level of imprecision due to the high number of studies (18) and participants (5794), only 1 of which had large confidence intervals. (3) Inconsistency: Studies in this outcome were deemed to have a very high level of heterogeneity as evidenced by the I2 value of 93%, with accompanying p value of &lt;0.00001. (4) Indirectness: Participants and interventions in all studies in this outcome did not differ from those of interest. This outcome was also specified in the PROSPERO protocol. (5) Publication bias: All studies for this outcome were judged to have a low publication bias, due to no obvious asymmetries in Funnel plots for any study outcomes and Eggers Testing.</p>  | <p>90.23 mg/dL      89.78 mg/dL</p> <p>Average difference (MD): 0.45 mg/dL lower<br/>(95% CI: 2.26 mg/dL lower to 1.36 mg/dL higher)<br/>Based on data from 3673 patients in 19 studies</p>   | <p>-</p>                          | <p>⊕⊕⊕⊕<br/>MODERATE<br/>Due to serious inconsistency.</p> |
| <b>Glycaemic control: RBS</b><br>Follow-up: 0 | <p>(1) Risk of Bias: Studies in this outcome were deemed to have a low risk of bias, with 3 studies out of 17 studies being non intention-to-treat. (Removal of these studies did not alter this outcome). (2) Imprecision: This outcome was judged to have a high level of imprecision due to the moderately low number of studies (17) and participants (3710), 1 of which had large confidence intervals. (3) Inconsistency: Studies in this outcome were deemed to have a high level of heterogeneity as evidenced by the I2 value of 84%, with accompanying p value of &lt;0.00001. (4) Indirectness: Participants and interventions in all studies in this outcome did not differ from those of interest. This outcome was also specified in the PROSPERO protocol. (5) Publication bias: All studies for this outcome were judged to have a low publication bias, due to no obvious asymmetries in Funnel plots for any study outcomes and Eggers Testing.</p> | <p>115.47 mg/dL      114.29 mg/dL</p> <p>Average difference (MD): 1.18 mg/dL lower<br/>(95% CI: 2.64 mg/dL lower to 0.28 mg/dL higher)<br/>Based on data from 3610 patients in 18 studies</p> | <p>-</p>                          | <p>⊕⊕⊕⊕<br/>MODERATE<br/>Due to serious inconsistency.</p> |
| <b>Maternal hypoglycaemia</b><br>Follow-up: 0 | <p>(1) Risk of Bias: Studies in this outcome were deemed to have a low risk of bias, with 3 studies out of 17 studies being non intention-to-treat. (Removal of these studies did not alter this outcome). (2) Imprecision: This outcome was judged to have a high level of imprecision due to the low number of studies (5) and participants (679), 4 of which had large confidence intervals. (3) Inconsistency: Studies in this outcome were deemed to have a low level of heterogeneity as evidenced by the I2 value of 0%, with accompanying p value of 0.65. (4) Indirectness: Participants and interventions in all studies in this outcome did not differ from those of interest. This outcome was also specified in the PROSPERO protocol. (5) Publication bias: All studies for this outcome were judged to have a low publication bias, due to no obvious asymmetries in Funnel plots for any study outcomes and Eggers Testing.</p>                       | <p>78 per 1000      38 per 1000</p> <p>Difference: 40 fewer per 1000 patients<br/>(95% CI: 55 to 13 fewer per 1000 patients)<br/>Based on data from 1149 patients in 6 studies</p>            | <p>OR 0.47<br/>(0.28 to 0.8)</p>  | <p>⊕⊕⊕⊕<br/>MODERATE<br/>Due to serious imprecision.</p>   |

## Supplementary Fig S7: All combined groups

### a) GWG

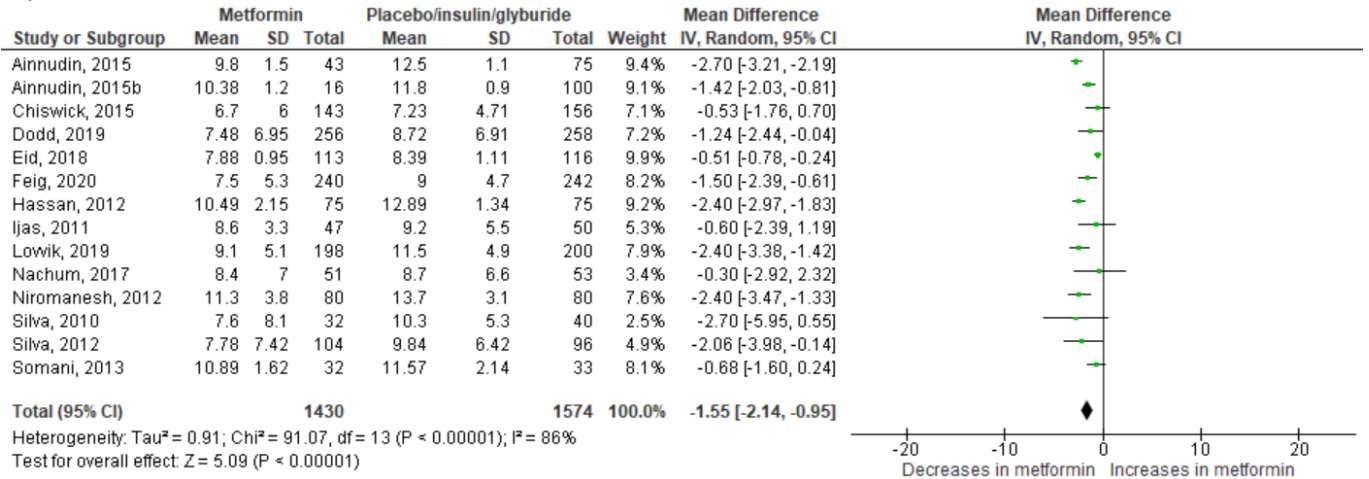

### b) Pre-eclampsia

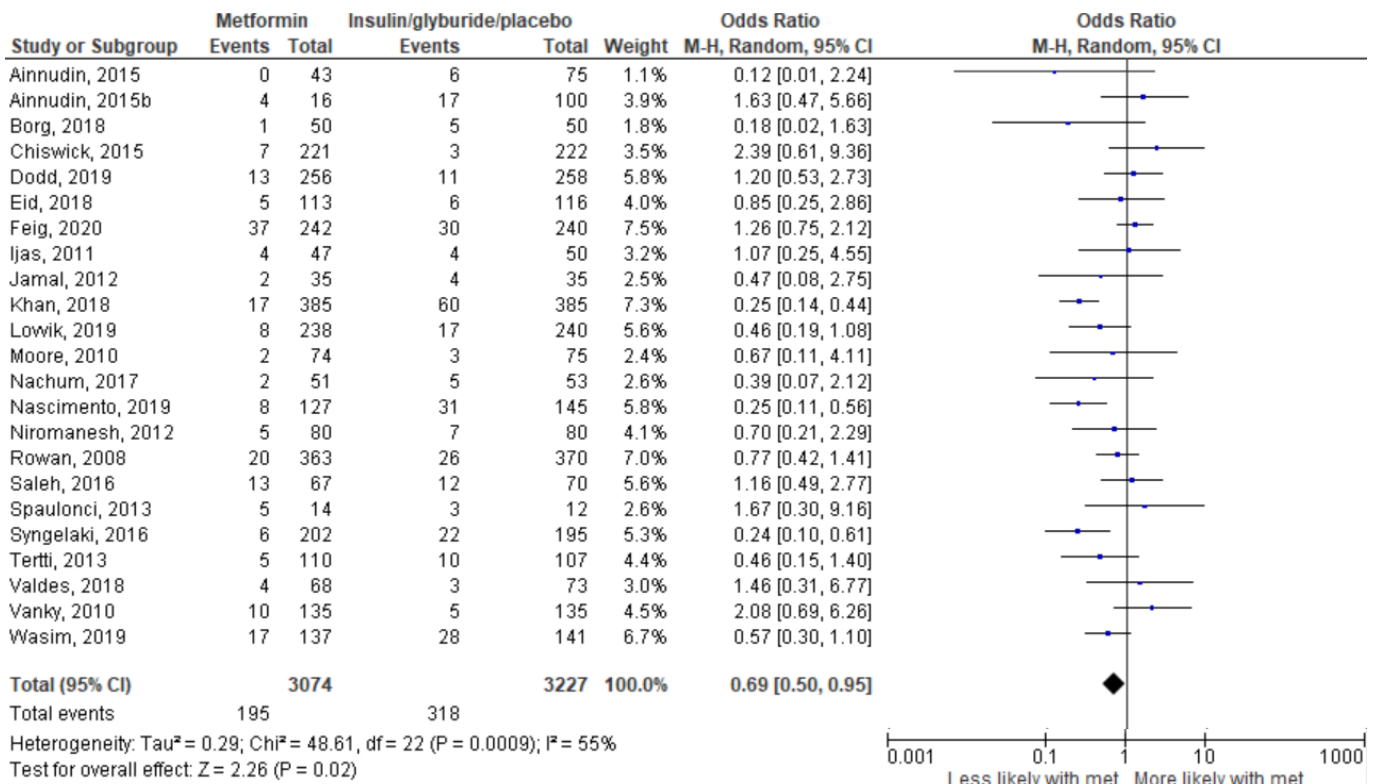

### c) Gestational hypertension

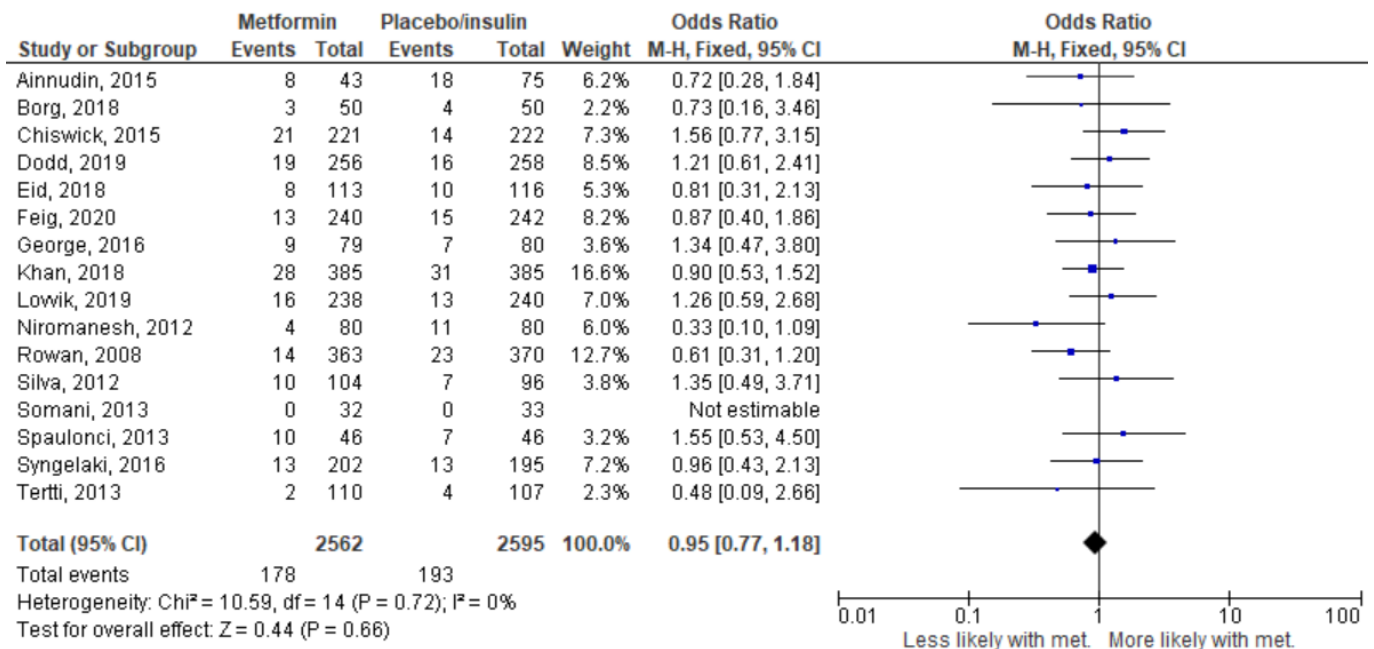

d) Pre-eclampsia and gestational hypertension (combined)

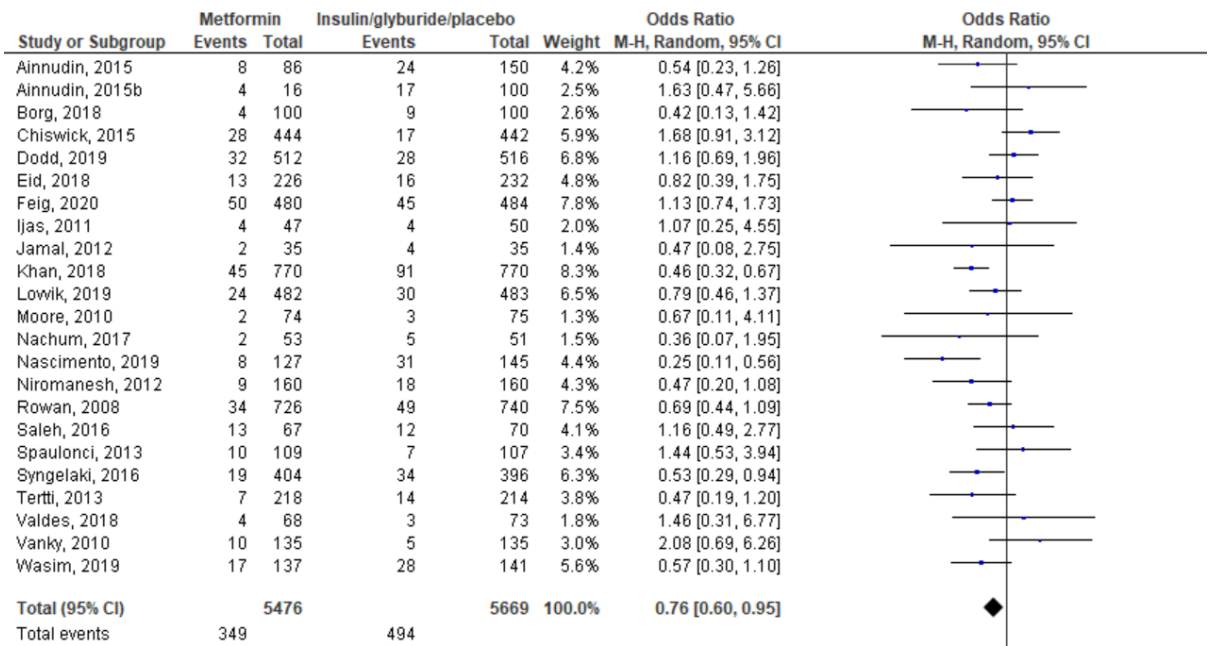

e) All cause preterm delivery

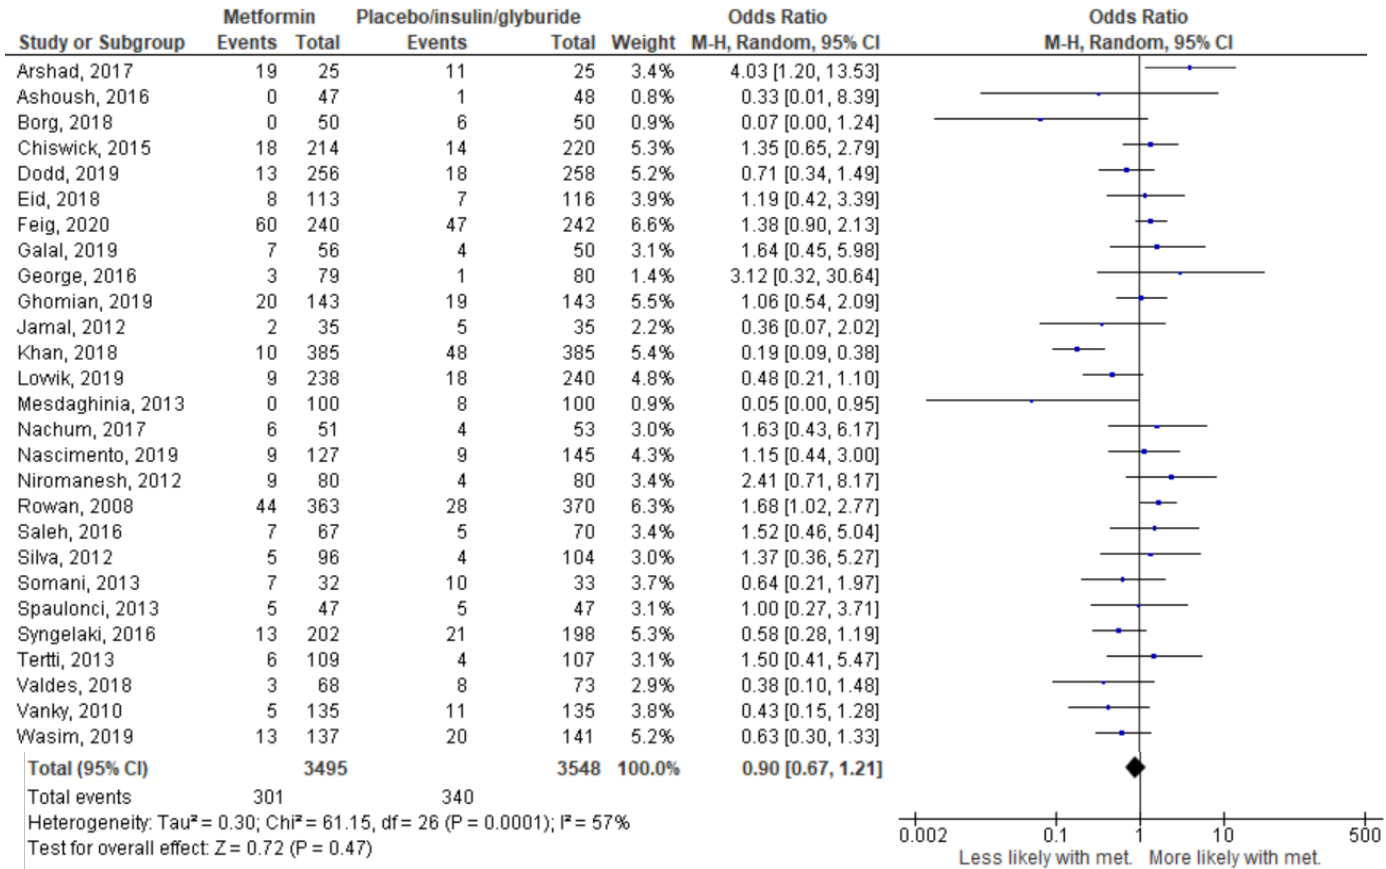

f) Gestational age at delivery

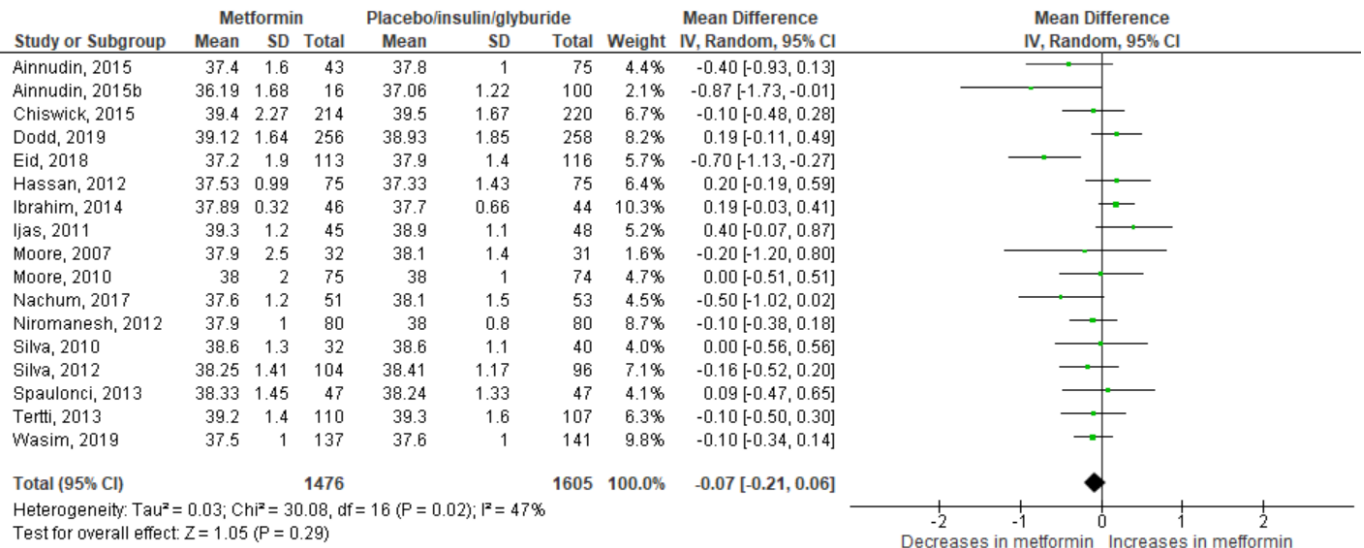

### g) Cesarean-section: all reasons

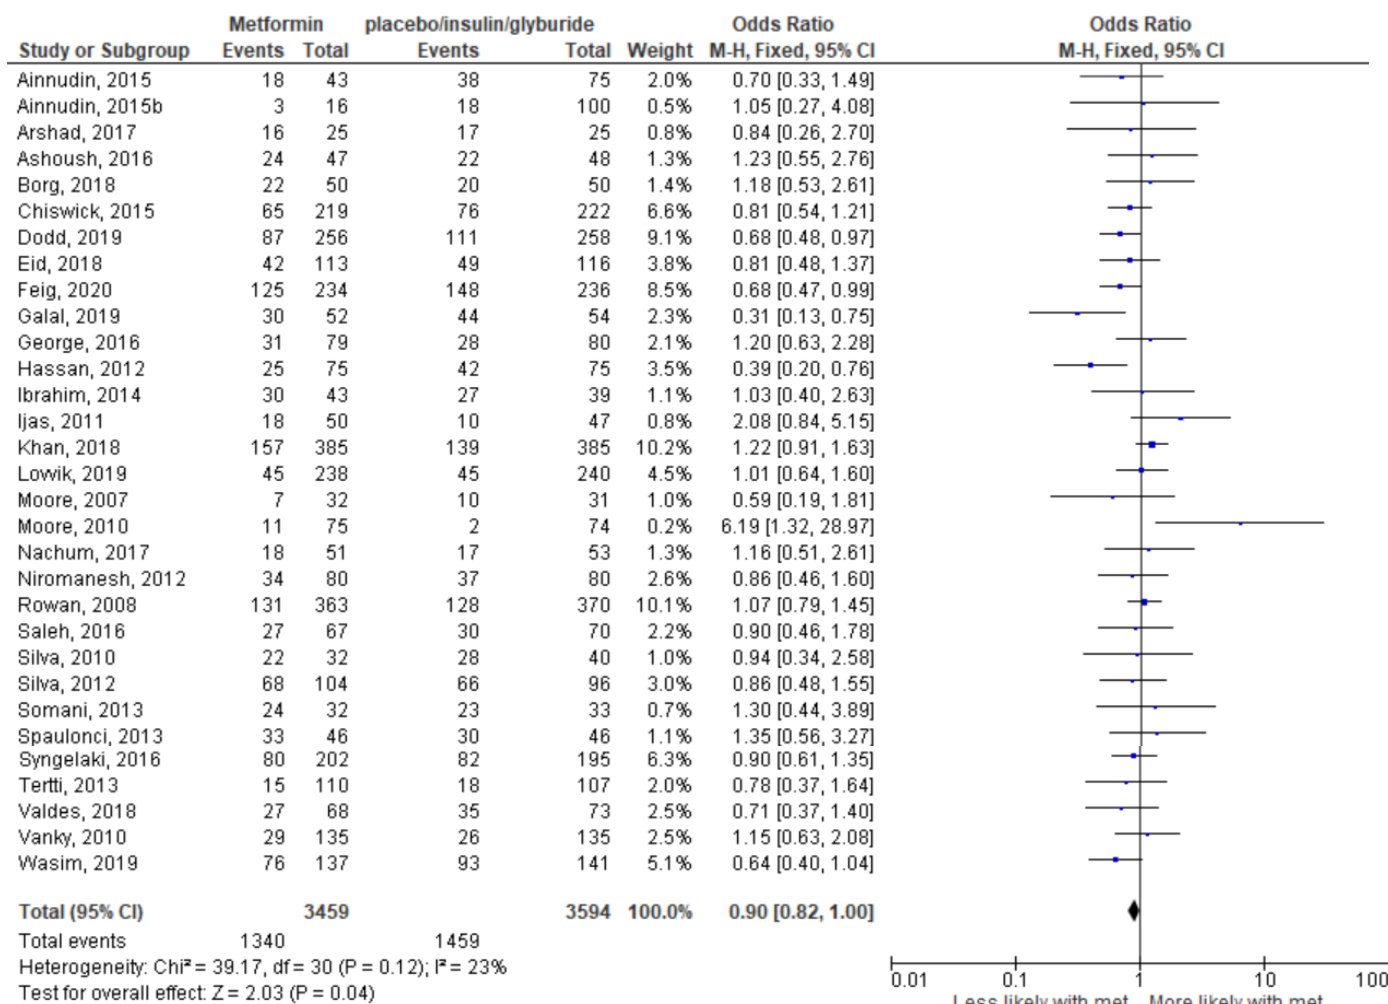

### h) Emergency caesarean-section

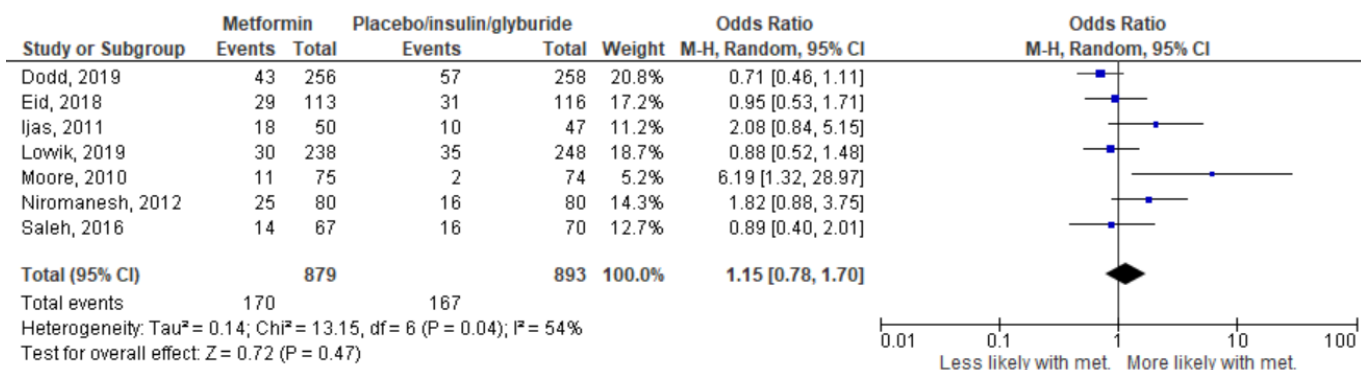

### i) Elective caesarean-section

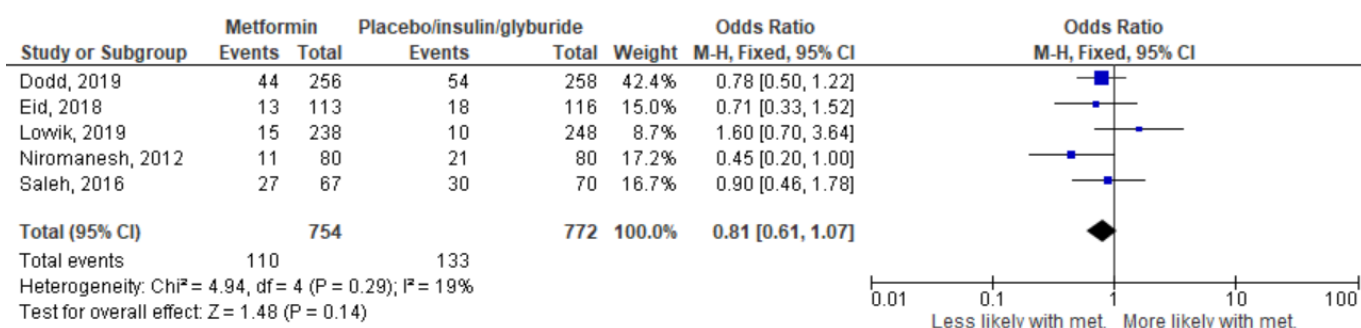

### Supplementary Fig S8: New GDM development

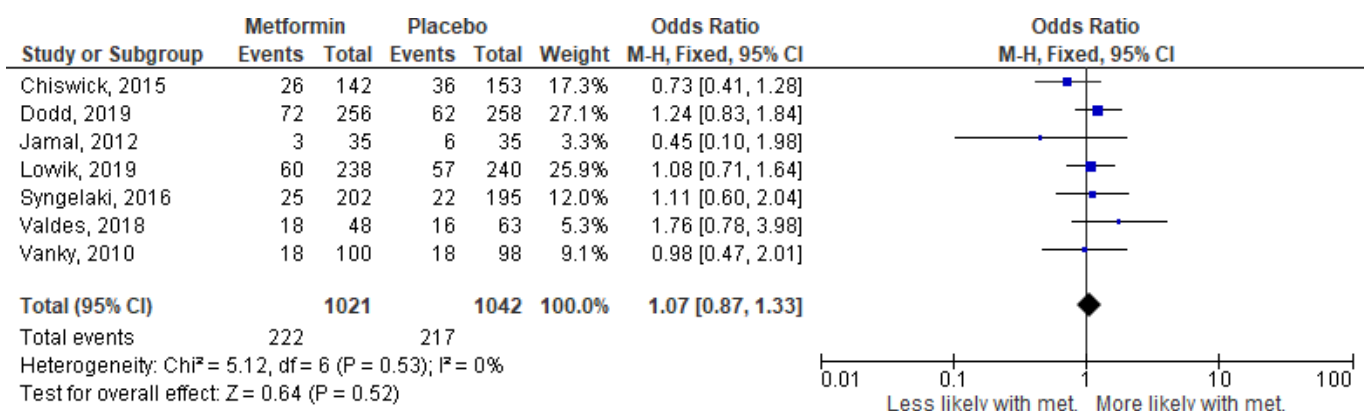

#### New GDM development

GDM=gestational diabetes mellitus; met=metformin.

Odds Ratio ± 95% CI. Fixed or random-effect model.



## Supplementary Fig. S9: Glycaemic control: FBS

### a) FBS (all studies)

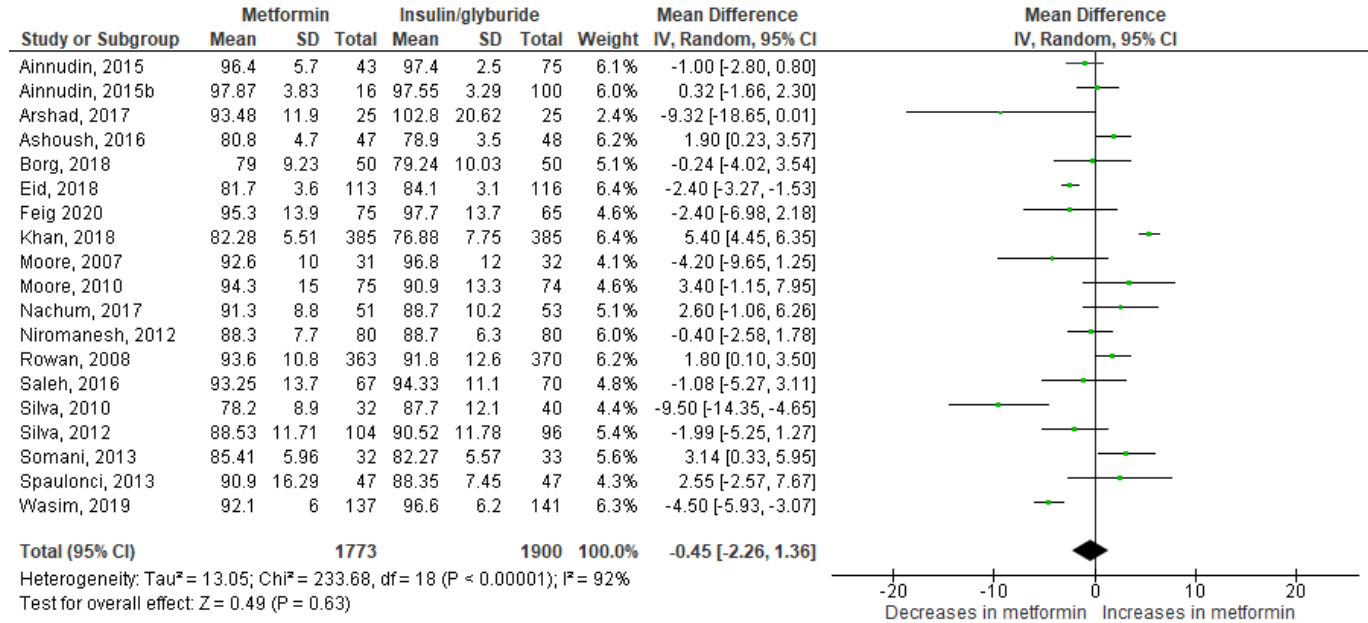

### b) FBS: Metformin vs. insulin sub-group

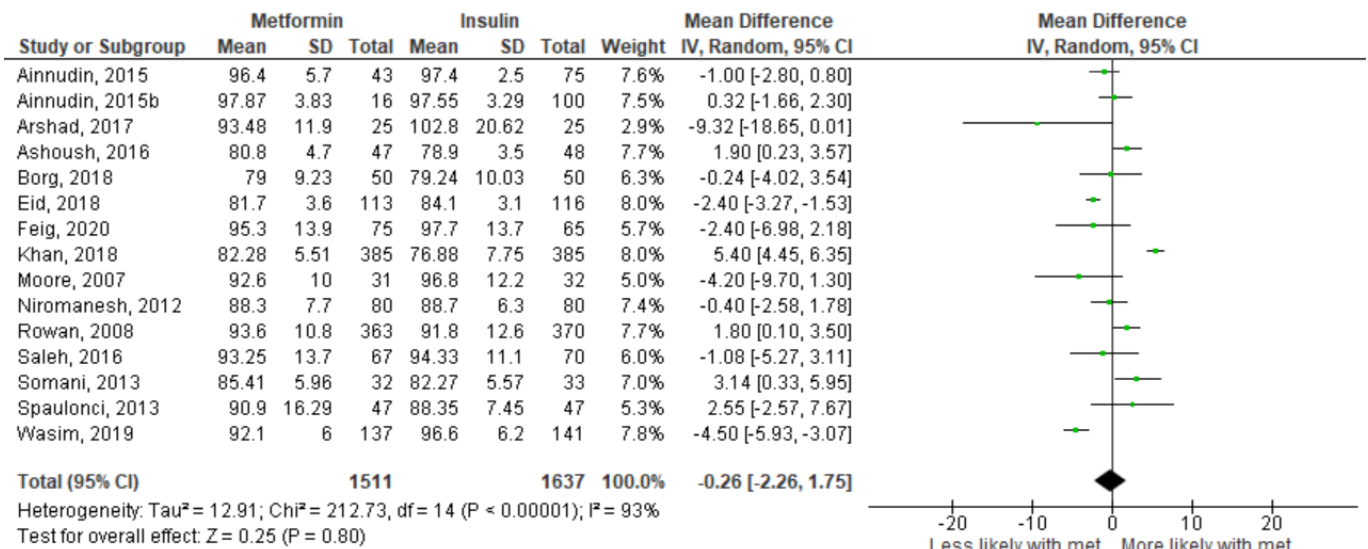

### c) FBS: Metformin vs. glyburide sub-group

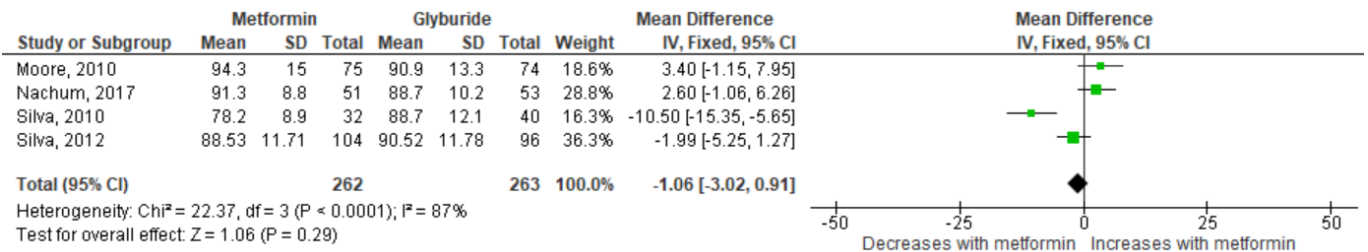

## Supplementary Fig S10: Glycaemic: control: RBS

### a) RBS

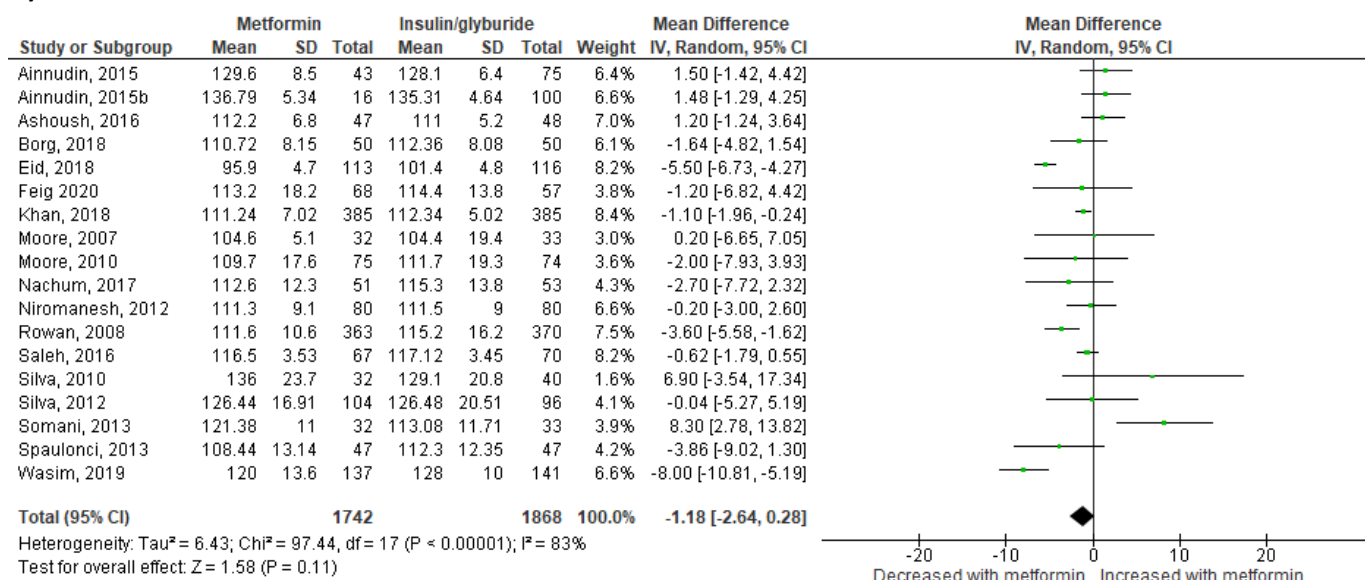

### b) RBS (metformin vs. insulin sub-group)

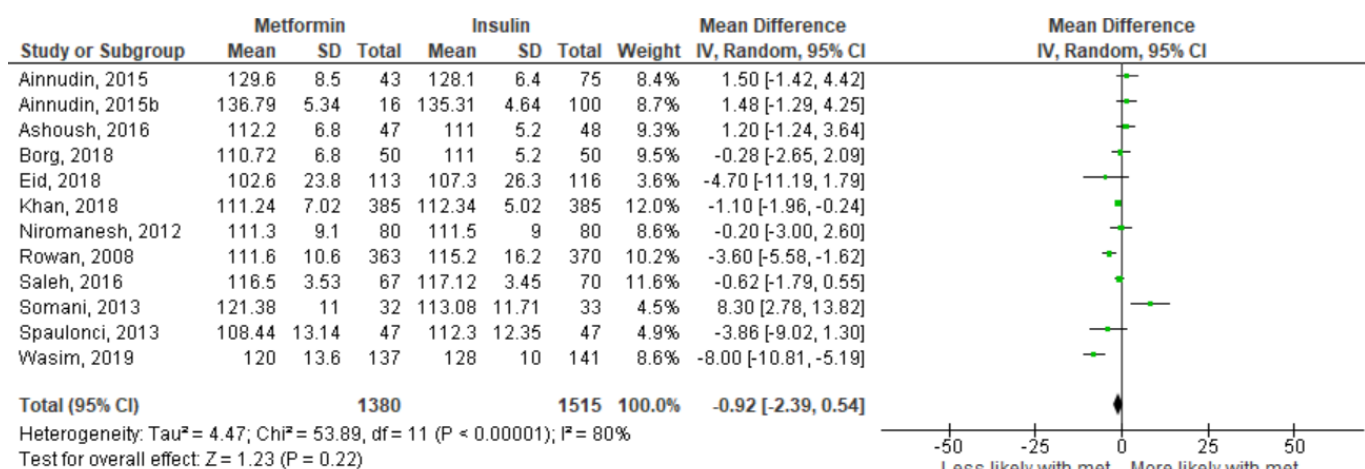

### c) RBS (metformin vs. glyburide sub-group)

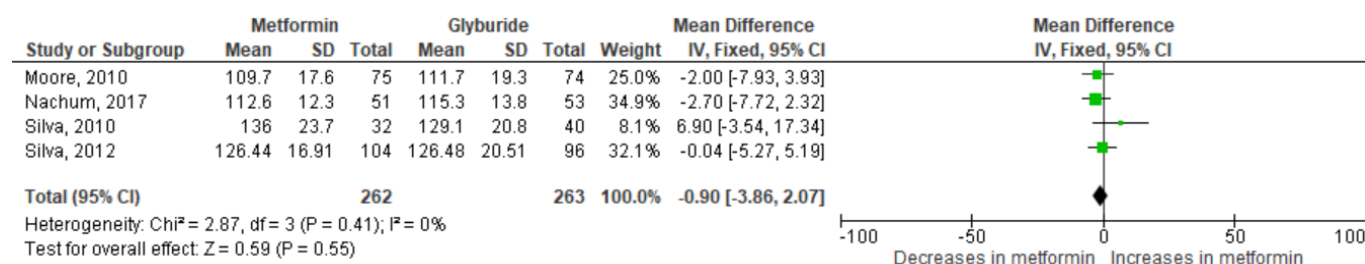

OR=Odds Ratio; 95% confidence intervals  
 RBS=random blood glucose; met-metformin

## Supplementary Fig S11: Maternal hypoglycaemia

a) All studies

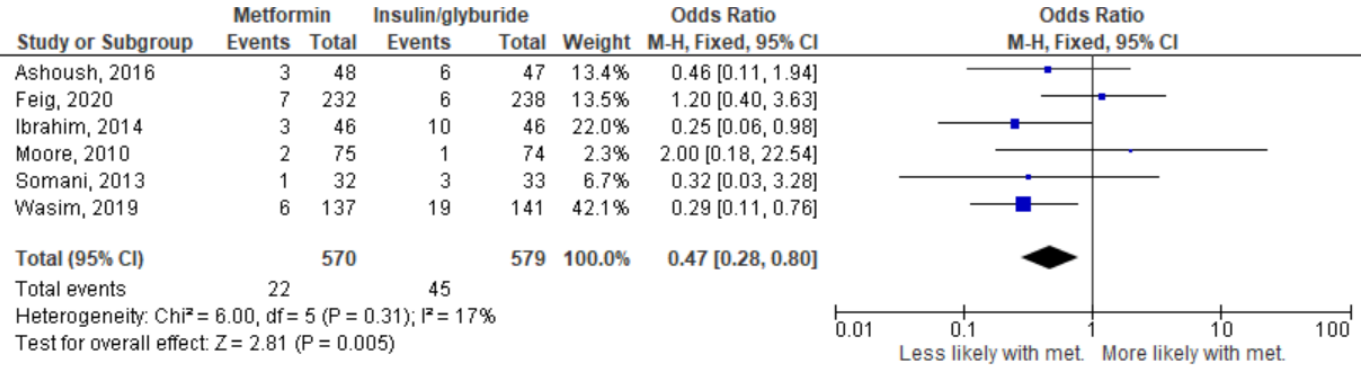

b) Metformin vs. insulin only

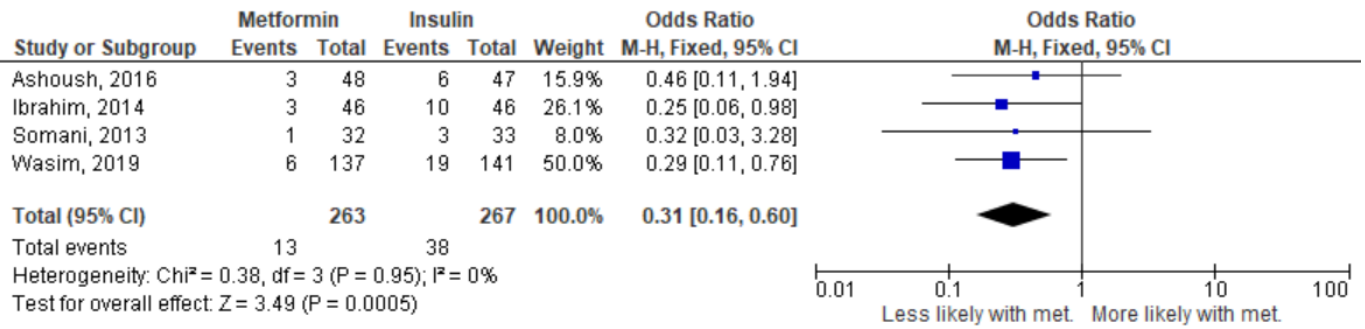

**Supplementary Table S1: Results of heterogeneity analysis and calculation of prediction intervals**

| Outcome                     | Test of moderators | Residual heterogeneity | Cochran's Q       | I <sup>2</sup> | H <sup>2</sup> | 95% prediction interval |
|-----------------------------|--------------------|------------------------|-------------------|----------------|----------------|-------------------------|
| Gestational weight gain     | 1.99<br>p=0.57     | 67.47<br>p<0.001       | 90.75<br>p<0.0001 | 80%            | 4.99           | -3.17-0.05              |
| Pre-eclampsia               | 8.96†<br>P=0.26    | 24.63<br>P=0.06        | 48.28<br>P=0.001  | 53%            | 2.13           | 0.24-1.99               |
| PIH                         | 4.92<br>P=0.55     | 5.41<br>P=0.80         | 9.82<br>p=0.83    | 0%             | 1.00           | 0.78-1.19               |
| Preterm birth               | 6.02<br>p=0.42     | 47.11<br>p=0.003       | 60.31<br>p<0.0001 | 56%            | 2.31           | 0.31-2.64               |
| Gestational age at delivery | 4.37<br>p=0.36     | 18.43<br>p=0.10        | 30.06<br>p=0.02   | 48%            | 1.93           | -0.48-0.32              |
| Cesarean section            | 3.57<br>P=0.73     | 33.66<br>P=0.09        | 38.71<br>P=0.13   | 18%            | 1.23           | 0.66-1.18               |

Results of heterogeneity analysis and calculation of prediction intervals

The test of moderators was performed by specifying a random-effects meta-regression with categorical moderators for both treatment indication (GDM, obesity, PCOS, diabetes in pregnancy) and comparator group (placebo, glyburide, insulin). The reported value is the result of the omnibus test for the effect of these moderators ( $Q_M$ ). Additional checks were performed to ensure that the individual levels of each moderator also returned non-significant impacts on the meta-regression results. † GDM was a significant moderator in the context of pre-eclampsia only (p=0.034). The residual heterogeneity is calculated from the same meta-regression model ( $Q_E$ ). Cochran's Q, I<sup>2</sup>, and H<sup>2</sup> values are obtained from the random-effects meta-analysis with all sub-groups combined, as are the 95% prediction intervals.

**Supplementary Table S2: Inclusion/Exclusion table**

|                     | <b>Title/Abstract</b>                                                                                                                                                                                                                                                                                                                                                       | <b>Screening</b>                                                                                                                                                                                                                                                                                                    | <b>Full Text</b>                                                                                                                                                                                                                                                                                                                                                           | <b>Screening</b>                                                                                                                                                                                                                                                                                                 |
|---------------------|-----------------------------------------------------------------------------------------------------------------------------------------------------------------------------------------------------------------------------------------------------------------------------------------------------------------------------------------------------------------------------|---------------------------------------------------------------------------------------------------------------------------------------------------------------------------------------------------------------------------------------------------------------------------------------------------------------------|----------------------------------------------------------------------------------------------------------------------------------------------------------------------------------------------------------------------------------------------------------------------------------------------------------------------------------------------------------------------------|------------------------------------------------------------------------------------------------------------------------------------------------------------------------------------------------------------------------------------------------------------------------------------------------------------------|
|                     | <b>Inclusion criteria</b>                                                                                                                                                                                                                                                                                                                                                   | <b>Exclusion criteria</b>                                                                                                                                                                                                                                                                                           | <b>Inclusion criteria</b>                                                                                                                                                                                                                                                                                                                                                  | <b>Exclusion criteria</b>                                                                                                                                                                                                                                                                                        |
| <b>Study design</b> | <ul style="list-style-type: none"> <li>Human studies.</li> <li>&gt;50 cases.</li> </ul>                                                                                                                                                                                                                                                                                     | <ul style="list-style-type: none"> <li>Animal studies.</li> <li>&lt; 50 cases.</li> <li>&lt; 10 cases for metformin group.</li> <li>Non-primary research articles (including reviews).</li> <li>Editorial comments, meeting abstracts (with insufficient data), book chapters, non-peer review articles.</li> </ul> | <ul style="list-style-type: none"> <li>Human studies</li> <li>&gt;50 cases</li> <li>Randomised controlled studies and prospective randomised controlled studies.</li> </ul>                                                                                                                                                                                                | <ul style="list-style-type: none"> <li>Animal studies</li> <li>&lt; 50 cases</li> <li>&lt;10 cases for metformin group.</li> <li>Non-primary research articles (including reviews).</li> <li>Editorial comments, meeting abstracts (with insufficient data), book chapters, non-peer review articles.</li> </ul> |
| <b>Group</b>        | <ul style="list-style-type: none"> <li>Pregnant women with metformin intervention only.</li> </ul>                                                                                                                                                                                                                                                                          | <ul style="list-style-type: none"> <li>Pregnant women randomised to metformin not in combination with any other trial drug</li> </ul>                                                                                                                                                                               | <ul style="list-style-type: none"> <li>Women with any indication requiring metformin during pregnancy.</li> <li>Singleton pregnancies.</li> </ul>                                                                                                                                                                                                                          | <ul style="list-style-type: none"> <li>Pregnant women randomised to metformin not in combination with any other trial drug</li> </ul>                                                                                                                                                                            |
| <b>Exposure</b>     | <ul style="list-style-type: none"> <li>Metformin vs. other pharmacological intervention AND/OR diet AND/OR lifestyle.</li> </ul>                                                                                                                                                                                                                                            |                                                                                                                                                                                                                                                                                                                     | <ul style="list-style-type: none"> <li>Metformin vs. other drug and/or diet/lifestyle for pregnant women.</li> </ul>                                                                                                                                                                                                                                                       |                                                                                                                                                                                                                                                                                                                  |
| <b>Outcome</b>      | <ul style="list-style-type: none"> <li>'Baseline' maternal parameters recorded before study start and/or at follow-up</li> </ul> <p>OR</p> <ul style="list-style-type: none"> <li>Pregnancy and delivery complications recorded (e.g. gestational hypertension, pre-eclampsia, preterm birth, side-effects, mode of delivery, glycaemic control, GDM incidence).</li> </ul> |                                                                                                                                                                                                                                                                                                                     | <ul style="list-style-type: none"> <li>Maternal parameters recorded before study start and/or after study/follow-up.</li> </ul> <p>OR</p> <ul style="list-style-type: none"> <li>Pregnancy and delivery complications recorded (e.g. gestational hypertension, pre-eclampsia, preterm birth, side-effects, mode of delivery, glycaemic control, GDM incidence).</li> </ul> |                                                                                                                                                                                                                                                                                                                  |

**Supplementary Table S3: Risk of Bias**

| Study or Subgroup | Risk of Bias |   |   |   |   |   |   |
|-------------------|--------------|---|---|---|---|---|---|
|                   | A            | B | C | D | E | F | G |
| Ainnudin, 2015    | +            | ? | + | ? | + | + | + |
| Ainnudin, 2015b   | +            | ? | + | ? | + | ? | + |
| Arshad, 2017      | +            | ? | + | ? | ? | ? | + |
| Ashoush, 2016     | +            | ? | + | + | + | + | ? |
| Borg, 2018        | +            | + | + | ? | + | + | + |
| Chiswick, 2015    | +            | + | + | + | ? | + | + |
| Dodd, 2019        | +            | + | + | + | + | + | + |
| Eid, 2018         | ?            | ? | + | ? | + | + | + |
| Feig 2020         | +            | ? | + | + | + | + | ? |
| Galal, 2019       | ?            | ? | + | ? | ? | ? | ? |
| George, 2016      | +            | + | ? | + | + | + | ? |
| Ghomian, 2019     | ?            | ? | ? | ? | ? | ? | + |
| Hassan, 2012      | +            | ? | + | ? | + | + | + |
| Ibrahim, 2014     | ?            | ? | + | ? | ? | + | + |
| Ijas, 2011        | +            | + | + | ? | + | + | + |
| Jamal, 2012       | +            | + | + | ? | + | + | ? |
| Khan, 2018        | +            | ? | + | ? | + | ? | + |
| Lowik, 2019       | +            | + | + | + | ? | + | + |
| Mesdaghinia, 2013 | +            | ? | + | + | + | + | + |
| Moore, 2007       | +            | + | + | + | + | + | + |
| Moore, 2010       | ?            | ? | + | ? | ? | ? | ? |
| Nachum, 2017      | +            | + | ? | ? | + | + | + |
| Nascimento, 2020  | +            | ? | ? | ? | + | + | ? |
| Niromanesh, 2012  | +            | + | + | + | + | + | + |
| Rowan, 2008       | +            | ? | + | ? | + | + | + |
| Saleh, 2016       | ?            | ? | + | ? | + | + | + |
| Silva, 2010       | +            | + | + | ? | ? | + | + |
| Silva, 2012       | +            | + | + | ? | + | ? | + |
| Somani, 2013      | +            | ? | + | + | + | + | + |
| Spaulonci, 2013   | +            | ? | + | ? | + | + | + |
| Syngelaki, 2016   | +            | ? | + | ? | + | + | + |
| Terti, 2013       | +            | + | + | ? | + | + | + |
| Valdes, 2018      | ?            | ? | ? | ? | + | ? | + |
| Vanky, 2010       | +            | + | ? | ? | + | + | + |
| Wasim, 2019       | ?            | ? | + | ? | ? | + | + |

Risk of bias legend

- (A) Random sequence generation (selection bias)
- (B) Allocation concealment (selection bias)
- (C) Blinding of participants and personnel (performance bias)
- (D) Blinding of outcome assessment (detection bias)
- (E) Incomplete outcome data (attrition bias)
- (F) Selective reporting (reporting bias)
- (G) Other bias

Risk of Bias analysis

Green circles=low risk of bias; yellow circles=unknown risk of bias; red circles=high risk of bias

**Supplementary Table 4: Study characteristics**

This table is found as an Excel Spreadsheet

**Supplementary Table S5: Heterogeneity of GDM/PCOS/maternal obesity diagnosis**

| <b>Paper citation</b> | <b>GDM/PCOS diagnosis criteria</b>                          |
|-----------------------|-------------------------------------------------------------|
| 27,53                 | ACOG                                                        |
| 23,25,26,39,47,48     | ADA                                                         |
| 37                    | ADIPS                                                       |
| 28,34,36,41           | CC                                                          |
| 40                    | FNC                                                         |
| 24                    | IADPSG                                                      |
| 42,45                 | NDDG                                                        |
| 38,44,46,49,51,54     | WHO                                                         |
| 35                    | UNSPECIFIED                                                 |
| 31,50                 | <i>Rotterdam</i>                                            |
| 33                    | <i>Rotterdam &amp; NIH</i>                                  |
| 29,30,32              | <i>Maternal obesity (<math>\geq 30\text{kg/m}^2</math>)</i> |

Heterogeneity diagnosis for GDM/PCOS/maternal obesity diagnosis

ADA=American Diabetes Association; ADIPS=Australasian Diabetes in Pregnancy Society; CC=Carpenter-Coustan; FNC=Finnish National Criteria; GDM=gestational diabetes mellitus; IADPSG= International Association of Diabetes and Pregnancy Study Groups; NDDG= National Diabetes Diagnosis Group; NIH=National Institute of Health; PCOS=polycystic ovary syndrome; WHO=World Health Organisation



**Supplementary Table S6 Fig: Eggers Test**

| <b>Outcome</b>              | <b>Comparison</b>                        | <b>Effect</b> | <b>Eggers test</b> | <b>P value</b> |
|-----------------------------|------------------------------------------|---------------|--------------------|----------------|
| GWG                         | Metformin vs. all                        | ***           | 0.223              | 0.824          |
| GWG                         | Metformin vs. placebo                    | *             | 2.339              | 0.029          |
| GWG                         | Metformin vs. insulin                    | ***           | 0.037              | 0.971          |
| Pre-eclampsia               | Metformin vs. all                        | *             | -0.716             | 0.474          |
| Pre-eclampsia               | Metformin vs. placebo                    | N/S           | 1.351              | 0.177          |
| Pre-eclampsia               | Metformin vs. insulin                    | 0.08          | -0.391             | 0.696          |
| Gestational age at delivery | Metformin vs. insulin                    | N/S           | -1.32              | 0.190          |
| Preterm birth               | Metformin vs. all                        | N/S           | -1.637             | 0.102          |
| C-section                   | Metformin vs. all                        | N/S           | -0.115             | 0.909          |
| GDM                         | Metformin vs. placebo (maternal obesity) | N/S           | -0.996             | 0.190          |

Eggers Testing for publication bias

C-section=Cesarean-section; GDM=Gestational Diabetes Mellitus; GWG=gestational weight gain

**Supplementary Table S7: Effect of metformin treatment upon side effects (vs. placebo: PCOS and maternal obesity)**

| <b>Outcome</b>        |         | <b>Unadjusted OR<br/>(95% CI)</b> | <b>P value</b> | <b>Studies</b> | <b>N</b> | <b>Het. I<sub>2</sub></b> | <b>Het. P<br/>value</b> |
|-----------------------|---------|-----------------------------------|----------------|----------------|----------|---------------------------|-------------------------|
| <b>Nausea</b>         | Placebo | 1.44 (1.13-1.84)                  | .003           | 4              | 144<br>1 | 0%                        | .51                     |
| <b>Vomiting</b>       | Placebo | 1.42 (1.10-1.84)                  | .008           | 4              | 144<br>1 | 7%                        | .36                     |
| <b>Diarrhoea</b>      | Placebo | 2.73 (1.59-4.68)                  | .0003          | 4              | 144<br>1 | 68%                       | .02                     |
| <b>Abdominal pain</b> | Placebo | 1.00 (0.75-1.33)                  | .98            | 4              | 124<br>2 | 0%                        | .45                     |
| <b>Bloating</b>       | Placebo | 1.32 (0.73-2.38)                  | .36            | 1              | 240      | N/A                       | N/A                     |
| <b>Constipation</b>   | Placebo | 1.11 (0.76-1.63)                  | .59            | 2              | 797      | 15%                       | .28                     |
| <b>Headache</b>       | Placebo | 1.17 (0.82-1.69)                  | .39            | 2              | 797      | 69%                       | .07                     |

Likelihood of side effects in PCOS and maternal obesity pregnancies treated with metformin  
 OR= Odds Ratio ± 95% CI. Het=Heterogeneity

**Supplementary Table S8: Gastrointestinal side effects in women with diabetes in pregnancy randomised to metformin.**

| <b>First Author</b>     |                    | <b>Raw averages (%)</b> | <b>N</b> |
|-------------------------|--------------------|-------------------------|----------|
| <b>Ainnudin, 2015</b>   | GI side effects    | 7 (8)                   | 93       |
|                         | Stopped medication | 6 (6)                   | 93       |
| <b>Ashoush, 2016</b>    | GI side effects    | 14 (30)                 | 47       |
|                         | Stopped medication | 0 (0)                   | 47       |
| <b>Ijas, 2011</b>       | GI side effects    | 3 (6)                   | 50       |
|                         | Stopped medication | 3 (6)                   | 50       |
| <b>Niromanesh, 2012</b> | GI side effects    | 6 (8)                   | 80       |
|                         | Stopped medication | 3 (4)                   | 80       |
| <b>Rowan, 2008</b>      | GI side effects    | 32 (9)                  | 363      |
|                         | Stopped medication | 7 (2)                   | 363      |
| <b>Spaulonci, 2013</b>  | GI side effects    | 21 (46)                 | 46       |
|                         | Stopped medication | 1 (2)                   | 46       |
| <b>Terti, 2013</b>      | GI side effects    | 2 (2)                   | 110      |
|                         | Stopped medication | 2 (2)                   | 110      |
| <b>Wasim, 2020</b>      | GI side effects    | 4 (3)                   | 137      |
|                         | Stopped medication | 4 (3)                   | 137      |
| <b>Weighted average</b> | GI side effects    | 12.5                    | 929      |
| <b>Incidence (%)</b>    | Stopped medication | 14.3                    | 929      |

## Supplementary S1 Text: PROSPERO document

Is metformin use in pregnancy associated with an increased likelihood of maternal complications?

*Jane Tarry-Adkins, Catherine Aiken, Susan Ozanne*

### Citation

Jane Tarry-Adkins, Catherine Aiken, Susan Ozanne. Is metformin use in pregnancy associated with an increased likelihood of maternal complications?. PROSPERO 2020 CRD42020167692 Available from: [https://www.crd.york.ac.uk/prospero/display\\_record.php?ID=CRD42020167692](https://www.crd.york.ac.uk/prospero/display_record.php?ID=CRD42020167692)

### Review question

Is metformin use in pregnancy associated with an increased likelihood of maternal complications? Is there a higher risk of preterm birth, pre-eclampsia, or differences in maternal weight gain when treated with metformin compared to no treatment or other pharmacological therapies? Are there any sub-group differences in pregnancies treated for different indications or where treatment is commenced at different stages in pregnancy?

### Searches

PubMed, Ovid Embase, MEDLINE, Web of Science, the Cochrane Library and clintrials.gov

Database search date ranges: \* End date 1st Feb 2020 (search end date will alter and will reflect a date just before paper submission)

PubMed: Start date: June 1997 to \*

Ovid Embase: Start date: 1974 to \*

MEDLINE: Start date: 1946 to \*

Web of Science: Start date: 1900 to \*

The Cochrane Library: Start date: Database inception to \*

Clin.trials.gov: Start date: Database inception to \*

No restrictions for publication dates or language have been/will be made in these searches. No filters were/are used during these searches.

PubMed search strategy example:

("metformin"[MeSH Terms] OR "metformin"[All Fields])

AND

("metformin"[MeSH Terms] OR "metformin"[All Fields]) AND ("diabetes, gestational"[MeSH Terms] OR ("diabetes"[All Fields] AND "gestational"[All Fields]) OR "gestational diabetes"[All Fields] OR ("gestational"[All Fields] AND "diabetes"[All Fields] AND "mellitus"[All Fields]) OR "gestational diabetes mellitus"[All Fields])

OVID EMBASE search strategy example:

1. metformin.mp.

2. metformin.ti, ab.

3. exp \*metformin/

## Supplementary S1 Text (page 2)

4. 2 or 3

5. (gestation\* adj3 diabet\*).ti, ab.

6 exp \*pregnancy diabetes mellitus/

7. 5 or 6

8. 4 and 7

Note: At the piloting of search selection process, addition of other indications such as "polycystic ovary syndrome" and /or "maternal obesity" in the search terms resulted in poor search outcomes and therefore was not used.

### Inclusion criteria:

- All languages.
- Human studies, > 50 cases.
- Randomised controlled and prospective randomised controlled studies.
- Pregnant women with metformin intervention.
- Metformin vs, other pharmacological intervention AND/OR diet AND/OR lifestyle for pregnant women.
- Outcomes: 'Baseline' maternal parameters recorded before the study start and/or follow-up AND/OR pregnancy and delivery complications recorded (including gestational hypertension, pre-eclampsia and preterm birth).

### Exclusion criteria:

- Non human studies, < 50 cases.
- Non primary research articles (including reviews).
- Editorial comments, meeting abstracts (with insufficient data), book chapters & non-peer review articles.
- Exclusion of participants based on fetal/birth weight.

### Types of study to be included

Included: Randomised controlled and prospective randomised controlled studies.

Excluded: Studies which are not randomised such as retrospective studies.

### Condition or domain being studied

Preterm birth, pre-eclampsia, and maternal weight gain after maternal metformin treatment for gestational diabetes (GDM), polycystic ovarian syndrome (PCOS), obesity, or other conditions.

### Participants/population

All pregnancies treated with metformin.

### Inclusion criteria:

- All languages

## Supplementary S1 Text (page 2)

4. 2 or 3

5. (gestation\* adj3 diabet\*).ti, ab.

6 exp \*pregnancy diabetes mellitus/

7. 5 or 6

8. 4 and 7

Note: At the piloting of search selection process, addition of other indications such as "polycystic ovary syndrome" and /or "maternal obesity" in the search terms resulted in poor search outcomes and therefore was not used.

### Inclusion criteria:

- All languages.
- Human studies, > 50 cases.
- Randomised controlled and prospective randomised controlled studies.
- Pregnant women with metformin intervention.
- Metformin vs, other pharmacological intervention AND/OR diet AND/OR lifestyle for pregnant women.
- Outcomes: 'Baseline' maternal parameters recorded before the study start and/or follow-up AND/OR pregnancy and delivery complications recorded (including gestational hypertension, pre-eclampsia and preterm birth).

### Exclusion criteria:

- Non human studies, < 50 cases.
- Non primary research articles (including reviews).
- Editorial comments, meeting abstracts (with insufficient data), book chapters & non-peer review articles.
- Exclusion of participants based on fetal/birth weight.

### Types of study to be included

Included: Randomised controlled and prospective randomised controlled studies.

Excluded: Studies which are not randomised such as retrospective studies.

### Condition or domain being studied

Preterm birth, pre-eclampsia, and maternal weight gain after maternal metformin treatment for gestational diabetes (GDM), polycystic ovarian syndrome (PCOS), obesity, or other conditions.

### Participants/population

All pregnancies treated with metformin.

### Inclusion criteria:

- All languages

- Human studies, > 50 cases.
- Randomised controlled and prospective randomised controlled studies.
- Pregnant women with metformin intervention.
- Metformin vs, other pharmacological intervention AND/OR diet AND/OR lifestyle for pregnant women.
- Outcomes: 'Baseline' maternal parameters recorded before the study start and/or follow-up AND/OR pregnancy and delivery complications recorded (including gestational hypertension, pre-eclampsia and preterm birth).

Exclusion criteria:

- Non human studies, < 50 cases.
- Non primary research articles (including reviews).
- Editorial comments, meeting abstracts (with insufficient data), book chapters & non-peer review articles.
- Exclusion of participants based on fetal/birth weight.

**Intervention(s), exposure(s)**

Metformin intervention during pregnancy.

**Comparator(s)/control**

Dependent upon the study, the reference group will be insulin-treated, diet-therapy, other pharmacological agents (such as glyburide), placebo, or un-treated women.

**Context**

Metformin is an oral glucose-lowering-agent, increasingly used in pregnancy, yet as it crosses the placenta; uncertainty exists regarding its use for indications during pregnancy. It is endorsed as an acceptable, economic alternative to insulin for gestational diabetes (GDM) treatment by national bodies and is increasingly used for other indications, including obesity and polycystic-ovarian-syndrome (PCOS), during pregnancy. GDM affects ~3%-25% of pregnancies worldwide, (1/3 of which will require drug therapy for glycaemic control). With obesity and maternal-age increasing in the maternity population, this rate is expected to continue to rise. It is difficult to fully estimate the numbers of women with PCOS as diagnosis is challenging, however global estimates show 3-10% of the female population are affected. New trials of metformin in pregnancy are planned in low-middle human-development-index countries. In these settings the high incidence of GDM (>25%) could result in ~10% of the pregnant population being prescribed metformin. Given the increasing scale of intrauterine metformin-exposure, studies investigating the potential effects on both mother and her unborn child are warranted. Preterm delivery is a commonplace pregnancy-complication with ~ 60, 000 babies/year in the UK born at < 37 gestational-weeks. Prematurity is associated with risk of still-birth, perinatal, neonatal, and infant-mortality, with survivors having increased risk of long-term disability. Pre-eclampsia and other hypertensive-disorders-of-pregnancy are common adverse outcomes leading to significant maternal morbidity. Gestational-weight-gain is an important influence on health during pregnancy, and for the mother's life-course health. This meta-analysis aims to elucidate the effect of metformin-exposure in pregnancy on common maternal adverse pregnancy-outcomes.

**Main outcome(s)**

Maternal outcomes: (Prenatal and perinatal)

- Preterm birth: (delivery < 37 weeks); (n values and %); (dichotomous data).
- Gestational age at delivery (weeks); (n values, mean, ± SD); (continuous data).
- Pre-eclampsia: (where threshold detailed: BP > 140/90mm/Hg with proteinuria >300mg/24hr); (n values and %), (dichotomous data).



## Supplementary S1 Text (page 4)

- Pregnancy-induced hypertension: (where threshold detailed: BP >140/90 mm/Hg); (n values & %), (dichotomous data).
- Gestational weight gain (kg), (n value, mean  $\pm$  SD); (continuous data).
- Other maternal outcomes.

### \* Measures of effect

Main outcomes will be assessed as continuous/dichotomous variables in the specified units, at all ages reported after or before delivery.

### Additional outcome(s)

Maternal outcomes: (Prenatal and perinatal)

- Mode of delivery (n values and % - dichotomous data) or (n values, mean and  $\pm$  SD - continuous data).
- Maternal glycaemic control:(n values and % - dichotomous data) or (n values, mean and  $\pm$  SD - continuous data).

Postnatal outcomes:

- Later postnatal outcomes: (n values and % - dichotomous data) or (n values, mean and  $\pm$  SD - continuous data).

### \* Measures of effect

Secondary outcomes will be assessed as continuous/dichotomous variables in the specified units, at all ages reported after or before delivery.

### Data extraction (selection and coding)

PubMed, Ovid Embase, MEDLINE, Web of Science and The Cochrane Library will be searched systematically, after which the papers will be screened on Title and Abstract, by two reviewers independently. The full texts of these selected studies will be independently assessed using inclusion and exclusion criteria. Disagreement over the eligibility will be discussed with a third reviewer.

We intend to extract the following data: author, year of publication, country, sample size, exposure unit (mg), duration of exposure to metformin, diagnostic criteria for GDM/PCOS/obesity or other conditions, population randomisation criteria, reported outcomes including maternal baseline characteristics pregnancy (including duration of gestation), delivery and neonatal outcomes.

### Risk of bias (quality) assessment

The quality of studies will be assessed using the modified Cochrane Collaboration tool to assess risk of bias for randomized controlled trials. Bias is assessed as a judgment (high, low, or unclear) for individual elements from seven domains: (selection (randomisation), selection (concealment), performance, detection, attrition, reporting, and other). This assessment will be performed by two reviewers independently. Disagreement between reviewers regarding the quality of a study will be discussed with a third reviewer.

### Strategy for data synthesis

To synthesise and analyse quantitative data, a systematic review/meta-analysis will be conducted using R. Heterogeneity will be assessed with Galbraith plots, and the decision to use a fixed-effect or random-effects model will be based on this analysis. Data will be graphically displayed using forest plots. Additionally, meta-regression will be performed to explore the effects of heterogeneity in terms of study-level covariates. Publication bias will be assessed using funnel plots, plotting the effects sizes against standard errors.

### Analysis of subgroups or subsets



## **Supplementary S2 Text: Database search terms**

### **PubMed:**

Initial search date: 19.11.19. (Search date range: June 1997 to 19.11.19).

Basic search terms: Metformin AND Gestational diabetes mellitus

("metformin"[MeSH Terms] OR "metformin"[All Fields]) AND ("diabetes, gestational"[MeSH Terms] OR ("diabetes"[All Fields] AND "gestational"[All Fields]) OR "gestational diabetes"[All Fields] OR ("gestational"[All Fields] AND "diabetes"[All Fields] AND "mellitus"[All Fields]) OR "gestational diabetes mellitus"[All Fields])

### **Web of Science:**

Initial search date: 19.11.19. (Search date range: 1900 to 19.11.19).

Basic search terms: Metformin AND Gestational diabetes mellitus

### **OVID EMBASE**

Search date range: 1974 to 19.11.19.

metformin.mp.

metformin.ti,ab.

exp\*metformin/

2 or 3

(gestation\*adj3 diabet\*).ti,ab.

exp\*pregnancy diabetes mellitus/

5 or 6

4 and 7

### **OVID MEDLINE**

Search date range: 1946 to 19.11.19.

metformin.mp.

metformin.ti,ab.

exp\*metformin/

2 or 3

(gestation\*adj3 diabet\*).ti,ab.

4 and 5

### **The Cochrane Database**

Search date range: Database inception to 19.11.19.

Basic search terms: Metformin AND Gestational diabetes mellitus

### **www.clinical trials.gov**

Search date range: Database inception to 19.11.19.

Basic search terms: Metformin AND gestational diabetes
